# Supplementary material for: Pharmacoscreening, molecular dynamics, and quantum mechanics of inermin from Panax ginseng: a crucial molecule inhibiting exosomal protein target associated with coronary artery disease progression
Source: PeerJ. 2023 Dec 6;11:e16481. doi: 10.7717/peerj.16481 (PMC10710165; doi:10.7717/peerj.16481)
Supplement: Supplemental Information 2 — The drug-likeness properties of all 27 compounds [file peerj-11-16481-s002.xlsx]

## Sheet: Sheet1
Molecule	#stars	CNS	mol_MW	donor HB	accpt HB	Qplog Po/w	QPlogS	QPPCaco	QPlogBB	QPPMDCK	Qplog Khsa	Percent Human Oral Absorption	Rule Of Five	Rule Of Three
MOL000269	3	0	208.257	0	2.25	2.872	-3.924	9906.04	-0.078	5899.29	0.064	100	0	0
MOL000676	1	0	278.347	0	4	3.682	-3.861	2007.5	-0.612	1050.72	0.162	100	0	0
MOL000787	0	2	353.374	0	7	1.763	-1.046	1454.76	0.774	820.704	-0.422	93.874	0	0
MOL001392	1	-1	242.401	0	2	5.037	-5.643	3043.31	-0.753	1647.36	0.728	100	1	0
MOL002136	1	0	194.273	0	3	2.325	-2.636	2614.22	-0.131	1397.81	-0.143	100	0	0
MOL003648	0	1	284.268	1	3.75	2.545	-2.983	2998.21	0.074	1620.99	0.028	100	0	0
MOL004100	0	0	227.262	2	3	2.55	-2.872	1112.61	-0.694	555.187	-0.113	96.402	0	0
MOL004275	3	1	220.354	0	2	2.519	-4.49	9906.04	0.109	5899.29	0.423	100	0	0
MOL005308	1	1	271.315	1	5.5	1.895	-1.789	893.74	0.383	484.724	-0.16	90.861	0	0
MOL005314	0	2	379.501	2	7	3.03	-3.775	832.473	0.577	642.296	0.249	96.956	0	0
MOL005315	2	0	154.252	0	2	2.457	-2.643	1985.4	-0.372	1038.22	-0.069	100	0	0
MOL005319	1	0	278.347	0	4	3.876	-4.69	3347.95	-0.157	1826.31	0.36	100	0	0
MOL005321	1	0	264.237	0	5	1.69	-2.433	990.111	-0.335	489.424	-0.433	90.459	0	0
MOL005348	0	-1	458.723	3	5.1	5.288	-5.973	1548.78	-0.539	793.789	1.166	100	1	2
MOL005351	0	0	258.36	1	3.7	4.179	-4.746	3114.03	-0.668	1688.78	0.302	100	0	0
MOL005352	0	-2	294.82	2	3.4	4.529	-5.525	1401.3	-1.124	1326.77	0.396	100	0	0
MOL005353	0	-2	276.375	3	5.1	3.202	-4.381	754.345	-1.638	364.769	-0.069	100	0	0
MOL005354	0	0	262.391	1	3.7	4.289	-5.056	3187.97	-0.663	1732.17	0.393	100	0	0
MOL005355	0	-1	258.36	0	4	3.96	-4.597	2318.18	-0.752	1227.53	0.209	100	0	0
MOL005357	1	0	514.571	1	7.25	5.287	-5.699	4025.02	-0.233	2228.6	0.893	96.504	2	1
MOL005360	0	-1	432.513	2	8.15	3.321	-4.501	973.327	-0.76	480.462	0.285	100	0	0
MOL005369	0	1	214.22	1	3.2	2.694	-3.258	4093.99	0.01	2269.91	-0.067	100	0	0
MOL005370	0	0	199.336	0	3	2.797	-2.822	2412.23	-0.33	2197.61	-0.23	100	0	0
MOL005371	0	0	188.309	2	3.4	2.429	-2.575	2363.3	-0.656	1253.37	-0.262	100	0	0
MOL005378	0	-2	278.391	3	5.1	3.154	-4.402	635.171	-1.715	302.899	-0.039	95.58	0	0
MOL005384	0	0	368.385	0	6	3.293	-3.059	3881.44	-0.17	2142.8	-0.121	100	0	0
MOL005392	1	-2	452.546	1	7	4.62	-6.005	862.362	-1.033	421.539	0.777	100	0	2
