# Supplementary material for: Pharmacoscreening, molecular dynamics, and quantum mechanics of inermin from Panax ginseng: a crucial molecule inhibiting exosomal protein target associated with coronary artery disease progression
Source: PeerJ. 2023 Dec 6;11:e16481. doi: 10.7717/peerj.16481 (PMC10710165; doi:10.7717/peerj.16481)
Supplement: Supplemental Information 5 — DFT analysis of inermin compound derived from Panax ginseng [file peerj-11-16481-s005.xlsx]

## Sheet: jag_MOL003648_spe_B3LYP_6-31Gss
Job jag_MOL003648_spe_B3LYP_6-31Gss started on systembiology1 at Tue Jun 13 14:03:56 2023
jobid: systembiology1-0-648829f2
+--------------------------------------------------------------------+
| Jaguar version 9.6, release 13 |
| |
| Copyright Schrodinger, Inc. |
| All Rights Reserved. |
| |
| The following have contributed to Jaguar (listed alphabetically): |
| Mike Beachy, Art Bochevarov, Dale Braden, Yixiang Cao, |
| Chris Cortis, Rich Friesner, Bill Goddard, Hod Greeley, |
| Tom Hughes, Leif Jacobson, Jean-Marc Langlois, |
| Daniel Mainz, Rob Murphy, Dean Philipp, Tom Pollard, |
| Murco Ringnalda, Mark Watson, Haoyu Yu. |
| |
| Use of this program should be acknowledged in publications as: |
| |
| Jaguar, version 9.6, Schrodinger, Inc., New York, NY, 2017. |
| |
| A. D. Bochevarov, E. Harder, T. F. Hughes, J. R. Greenwood, |
| D. A. Braden, D. M. Philipp, D. Rinaldo, M. D. Halls, |
| J. Zhang, R. A. Friesner, "Jaguar: A High-Performance Quantum |
| Chemistry Software Program with Strengths in Life and Materials |
| Sciences", Int. J. Quantum Chem., 2013, 113(18), 2110-2142. |
+--------------------------------------------------------------------+
start of program pre
Job name: jag_MOL003648_spe_B3LYP_6-31Gss
Executables used: C:\Program Files\Schrodinger2017-2\jaguar-v9.6\bin\Windows-x64
Temporary files : C:\Users\systembiology\AppData\Local\Schrodinger\tmp\jag_MOL003648_spe_B3LYP_#systembiology1-0-648829f2
Maestro file (input): jag_MOL003648_spe_B3LYP_6-31Gss.mae
Maestro file (output): jag_MOL003648_spe_B3LYP_6-31Gss.01.mae
basis set: 6-31g**
net molecular charge: 0
multiplicity: 1
keygen settings
ihamtyp... 0 numd...... 0 iout1..... 6
iguess.... 10 idecon.... 0 incdip.... 0
ldips..... 1 icfit..... 1 mulken.... 1
isymm..... 0 ihfgvb.... 2 newcon.... 1
nmder..... 0 igeopt.... 0 igonly.... 0
mp2....... 0 lmp2...... 1 isqm...... 0
isolv..... 0 iheter.... 0 fukui..... 0
idelocv... 0
isolvg.... 2 istate.... 0 ioss...... 0
lewdot.... 0 igvball... 0 igvbsel... 7
lewstr.... 0 ivanset... 0 ipolar.... 0
iordboy... 1 ixtrboy... 0
irder..... 0 icavity... 1 idoabe.... 0
ntemp..... 1 ifreq..... 0 ifreqfrag... -1
imw ...... 0
nogas..... 0 massav.... 0 isurf..... 0
itypk..... 0 ipkat..... 0 nohpk..... 0
loclmp2c... 0 loclmp2v... 2
locpostc... 0 locpostv... 0
ithermo... 1
tmpini.... 298.1500000
tmpstp.... 10.0000000
press..... 1.0000000
freqcut... 10.0000000
srlrc..... 0.3000000
srlru..... 0.3000000
efield.... 0.0000000
qstinit... 0.5000000
pertnd.... 0.0500000
scalfr.... 1.0000000
auto_scale... 0
rndsym.... 7.4928652 3.7492865 1.3749287
cfitsvd... 1.000E-04
cfitrhs... 1.000E+30
cfiterr... 1.000E-06
iraman... 0
dftname b3lyp
jdft...... 0
iuhf...... 1
ielec..... 0 negrid.... 0
Density Functional Parameters
Exact exchange: 0.200000
Slater local exchange: 0.800000
B88 non-local exchange: 0.720000
VWN local correlation: 0.190000
LYP non-local correlation: 0.810000
keydaf settings
idafcon... 0 idafsav... 0
naydaf 1000 1000 1000 1000 1000 1000 1000 1000 1000 1000
rdaferr... 0.3000000
keytweak settings
mtest..... 0 nosuper... 0
mxstrip... 200 mxpr...... 100
ndisk.....****
nbuck..... 64 nbcmax....1000000
keygvb settings
npair..... 0
keylmp2 settings
nlmpair..... 0
keygeo settings
iunit..... 1
ang123.... 0.0000000 0.0000000 0.0000000
covfac.... 1.2000000
keygrid settings
wispc..... 7.500E-01
ldens..... 0
denspc.... 7.500E-01
grid daf set nls grid set Q type
------ ------- --- -------- ------
coarse 1 1 1 1
medium 2 2 2 1
fine 3 2 3 0
ultrafine 4 2 4 1
charge 0 1 -1 1
gradient 5 2 4 1
density 0 1 0 0
DFT-fine 0 1 -11 0
DFT-med. 0 1 -10 0
DFT-grad 0 1 -12 0
DFT-der2 0 1 0 0
DFT-cphf 0 1 0 0
LMP2-enrg 4 2 4 1
LMP2-grad 5 2 2 1
DFT-cphf2 0 1 0 0
PBF-dens 0 1 0 0
plotting 0 1 -7 0
Rel-grad 0 1 -17 0
idftgrdm 100
ndftgrdm 50 0 0
idftgrdf 111
ndftgrdf 85 0 0
idftgrdg 111
ndftgrdg 80 3 0
idftgrdu 433
ndftgrdu 105 0 0
idftgrdd 433
ndftgrdd 105 0 0
idftgrdc 433
ndftgrdc 26 0 0
idftgrdp 433
ndftgrdp 18 0 0
keyscf settings
maxit..... 48 idiag..... 0 iconv..... 1
jksep..... 1 itwice.... 1 noauto.... 0
noatcor... 0 noupdat... 0 nops...... 0
maxdiis... 10 iteravg... 0 istavg.... 0
icomp..... 0 iacc...... 2 ipopsym... 0
lastwv.... 0 idenavg... 1 ipvirt.... 10
irohf..... 2
nscfa..... 0
econv..... 0.0000500
dconv..... 0.0001000
stdiis.... 100.0000000
vshift.... 0.0000000
keyopt settings
maxitg.... 100 inhess.... 0 intopt.... 1
ihuptyp... 1 nogdiis... 1 iaccg..... 2
irefhup... 4 nhesref... 0 ilagr..... 0
nooptr.... 0 noopta.... 0 nooptt.... 0
irfo...... 1 ifollow... 0 itrvec.... 0
itradj.... 0 itrcut.... 1
geometry convergence criteria: maximum rms
gradient............. 4.500E-04 3.000E-04
gdiis error vector... 1.000E-02 1.000E-02
displacement......... 1.800E-03 1.200E-03
total energy......... 5.000E-05
trust radius adjustment parameters:
trust..... 3.000E-01
tradmx.... 0.3000000
tradmn.... 0.3000000
tremx..... 0.2500000
treok..... 0.2000000
trescal... 2.0000000
trgmx..... 0.0000000
keysolv settings
kesep..... 0 idelver... 3
sconv..... 0.0001500
dlphsc.... 5.0000000
epsin..... 1.0000000
epsout.... 80.3700000
rionst.... 0.0000000
exrad..... 2.0000000
radprb.... 1.4000000
cosfden... 8.0000000
cskin.... 0.9500000
keynerg settings
esolv0.... 0.0000000
NBO analysis settings
nboden.... 0
atom vdw vdw2 cov mass grid daf charge basis
C1 1.949 1.900 0.770 12.000 Y Y Y 6-31g**
C2 1.949 1.900 0.770 12.000 Y Y Y 6-31g**
O3 1.702 1.600 0.730 15.995 Y Y Y 6-31g**
C4 1.949 1.900 0.770 12.000 Y Y Y 6-31g**
O5 1.702 1.600 0.730 15.995 Y Y Y 6-31g**
C6 1.949 1.900 0.770 12.000 Y Y Y 6-31g**
C7 1.949 1.900 0.770 12.000 Y Y Y 6-31g**
C8 1.949 1.900 0.770 12.000 Y Y Y 6-31g**
C9 1.949 1.900 0.770 12.000 Y Y Y 6-31g**
C10 1.949 1.900 0.770 12.000 Y Y Y 6-31g**
C11 1.949 1.900 0.770 12.000 Y Y Y 6-31g**
O12 1.702 1.600 0.730 15.995 Y Y Y 6-31g**
C13 1.949 1.900 0.770 12.000 Y Y Y 6-31g**
O14 1.702 1.600 0.730 15.995 Y Y Y 6-31g**
C15 1.949 1.900 0.770 12.000 Y Y Y 6-31g**
C16 1.949 1.900 0.770 12.000 Y Y Y 6-31g**
C17 1.949 1.900 0.770 12.000 Y Y Y 6-31g**
C18 1.949 1.900 0.770 12.000 Y Y Y 6-31g**
C19 1.949 1.900 0.770 12.000 Y Y Y 6-31g**
C20 1.949 1.900 0.770 12.000 Y Y Y 6-31g**
O21 1.702 1.600 0.730 15.995 Y Y Y 6-31g**
H22 1.597 1.150 0.320 1.008 Y Y Y 6-31g**
H23 1.597 1.150 0.320 1.008 Y Y Y 6-31g**
H24 1.597 1.150 0.320 1.008 Y Y Y 6-31g**
H25 1.597 1.150 0.320 1.008 Y Y Y 6-31g**
H26 1.597 1.150 0.320 1.008 Y Y Y 6-31g**
H27 1.597 1.150 0.320 1.008 Y Y Y 6-31g**
H28 1.597 1.150 0.320 1.008 Y Y Y 6-31g**
H29 1.597 1.150 0.320 1.008 Y Y Y 6-31g**
H30 1.597 1.150 0.320 1.008 Y Y Y 6-31g**
H31 1.597 1.150 0.320 1.008 Y Y Y 6-31g**
H32 1.597 1.150 0.320 1.008 Y Y Y 6-31g**
H33 1.597 1.150 0.320 1.008 Y Y Y 6-31g**
program parameters
npa........ 1000 nsh........ 800 nomx....... 7500
nfmx....... 12000 ntmx....... 42000 mxham...... 1000
ngblok..... 128 ngat....... 150000 nptr....... 30
nafmx...... 250 ngrdx...... 18
maxl....... 50 npgf....... 1602 npr........ 1500
npcn....... 625 npcb....... 126 npcbd...... 226
mxdl....... 100 mrx........ 1001
lmx........ 16 mxattyp.... 12
nopmx...... 120 npbp....... 8001 nspdfg..... 35
npairs..... 499500 noac....... 4 lfmax...... 5
llfmax..... 14 nshp....... 50000 iablksz.... 15
nbcfmx..... 128 nbcfmxx.... 128
maxbatch.... 128 mxbtaabc.... 128
ioerr...... 0
iodaf...... 18 iogrid..... 10 iobas...... 11
iogeo...... 12 iocut...... 13 ioxyza..... 120
ioqmat..... 160 ioxyz...... 140 iosave..... 50
iotmp...... 70 ioans...... 64 ionbya..... 80
ionbyn..... 81 iodiis..... 83 iodenv..... 84
ioopt...... 88 iosudo..... 87 iodrvab.... 96
number of basis functions.... 375
N by N matrices stored in 2 strip(s) of size 195
Basis set name for each atom
Atom Basis
C1 6-31g**
C2 6-31g**
O3 6-31g**
C4 6-31g**
O5 6-31g**
C6 6-31g**
C7 6-31g**
C8 6-31g**
C9 6-31g**
C10 6-31g**
C11 6-31g**
O12 6-31g**
C13 6-31g**
O14 6-31g**
C15 6-31g**
C16 6-31g**
C17 6-31g**
C18 6-31g**
C19 6-31g**
C20 6-31g**
O21 6-31g**
H22 6-31g**
H23 6-31g**
H24 6-31g**
H25 6-31g**
H26 6-31g**
H27 6-31g**
H28 6-31g**
H29 6-31g**
H30 6-31g**
H31 6-31g**
H32 6-31g**
H33 6-31g**
Gaussian basis set information
renorm mfac*renorm
atom fn prim L z coef coef coef
-------- ----- ---- --- ------------- ----------- ----------- -----------
C1 1 1 S 3.047525E+03 1.8347E-03 5.3635E-01 5.3635E-01
C1 1 2 S 4.573695E+02 1.4037E-02 9.8945E-01 9.8945E-01
C1 1 3 S 1.039487E+02 6.8843E-02 1.5973E+00 1.5973E+00
C1 1 4 S 2.921016E+01 2.3218E-01 2.0792E+00 2.0792E+00
C1 1 5 S 9.286663E+00 4.6794E-01 1.7742E+00 1.7742E+00
C1 1 6 S 3.163927E+00 3.6231E-01 6.1258E-01 6.1258E-01
C1 2 7 S 7.868272E+00 -1.1933E-01 -3.9956E-01 -3.9956E-01
C1 2 8 S 1.881289E+00 -1.6085E-01 -1.8416E-01 -1.8416E-01
C1 2 9 S 5.442493E-01 1.1435E+00 5.1639E-01 5.1639E-01
C1 3 10 X 7.868272E+00 6.8999E-02 1.2961E+00 1.2961E+00
4 Y 1.2961E+00
5 Z 1.2961E+00
C1 3 11 X 1.881289E+00 3.1642E-01 9.9375E-01 9.9375E-01
4 Y 9.9375E-01
5 Z 9.9375E-01
C1 3 12 X 5.442493E-01 7.4431E-01 4.9595E-01 4.9595E-01
4 Y 4.9595E-01
5 Z 4.9595E-01
C1 6 13 S 1.687145E-01 1.0000E+00 1.8762E-01 1.8762E-01
C1 7 14 X 1.687145E-01 1.0000E+00 1.5413E-01 1.5413E-01
8 Y 1.5413E-01
9 Z 1.5413E-01
C1 10 15 XX 8.000000E-01 1.0000E+00 1.1138E+00 1.1138E+00
11 YY 1.1138E+00
12 ZZ 1.1138E+00
13 XY 1.9292E+00
14 XZ 1.9292E+00
15 YZ 1.9292E+00
C2 16 1 S 3.047525E+03 1.8347E-03 5.3635E-01 5.3635E-01
C2 16 2 S 4.573695E+02 1.4037E-02 9.8945E-01 9.8945E-01
C2 16 3 S 1.039487E+02 6.8843E-02 1.5973E+00 1.5973E+00
C2 16 4 S 2.921016E+01 2.3218E-01 2.0792E+00 2.0792E+00
C2 16 5 S 9.286663E+00 4.6794E-01 1.7742E+00 1.7742E+00
C2 16 6 S 3.163927E+00 3.6231E-01 6.1258E-01 6.1258E-01
C2 17 7 S 7.868272E+00 -1.1933E-01 -3.9956E-01 -3.9956E-01
C2 17 8 S 1.881289E+00 -1.6085E-01 -1.8416E-01 -1.8416E-01
C2 17 9 S 5.442493E-01 1.1435E+00 5.1639E-01 5.1639E-01
C2 18 10 X 7.868272E+00 6.8999E-02 1.2961E+00 1.2961E+00
19 Y 1.2961E+00
20 Z 1.2961E+00
C2 18 11 X 1.881289E+00 3.1642E-01 9.9375E-01 9.9375E-01
19 Y 9.9375E-01
20 Z 9.9375E-01
C2 18 12 X 5.442493E-01 7.4431E-01 4.9595E-01 4.9595E-01
19 Y 4.9595E-01
20 Z 4.9595E-01
C2 21 13 S 1.687145E-01 1.0000E+00 1.8762E-01 1.8762E-01
C2 22 14 X 1.687145E-01 1.0000E+00 1.5413E-01 1.5413E-01
23 Y 1.5413E-01
24 Z 1.5413E-01
C2 25 15 XX 8.000000E-01 1.0000E+00 1.1138E+00 1.1138E+00
26 YY 1.1138E+00
27 ZZ 1.1138E+00
28 XY 1.9292E+00
29 XZ 1.9292E+00
30 YZ 1.9292E+00
O3 31 1 S 5.484672E+03 1.8311E-03 8.3172E-01 8.3172E-01
O3 31 2 S 8.252349E+02 1.3950E-02 1.5308E+00 1.5308E+00
O3 31 3 S 1.880470E+02 6.8445E-02 2.4771E+00 2.4771E+00
O3 31 4 S 5.296450E+01 2.3271E-01 3.2563E+00 3.2563E+00
O3 31 5 S 1.689757E+01 4.7019E-01 2.7929E+00 2.7929E+00
O3 31 6 S 5.799635E+00 3.5852E-01 9.5494E-01 9.5494E-01
O3 32 7 S 1.553962E+01 -1.1078E-01 -6.1793E-01 -6.1793E-01
O3 32 8 S 3.599934E+00 -1.4803E-01 -2.7572E-01 -2.7572E-01
O3 32 9 S 1.013762E+00 1.1308E+00 8.1421E-01 8.1421E-01
O3 33 10 X 1.553962E+01 7.0874E-02 3.1169E+00 3.1169E+00
34 Y 3.1169E+00
35 Z 3.1169E+00
O3 33 11 X 3.599934E+00 3.3975E-01 2.4014E+00 2.4014E+00
34 Y 2.4014E+00
35 Z 2.4014E+00
O3 33 12 X 1.013762E+00 7.2716E-01 1.0544E+00 1.0544E+00
34 Y 1.0544E+00
35 Z 1.0544E+00
O3 36 13 S 2.700058E-01 1.0000E+00 2.6696E-01 2.6696E-01
O3 37 14 X 2.700058E-01 1.0000E+00 2.7743E-01 2.7743E-01
38 Y 2.7743E-01
39 Z 2.7743E-01
O3 40 15 XX 8.000000E-01 1.0000E+00 1.1138E+00 1.1138E+00
41 YY 1.1138E+00
42 ZZ 1.1138E+00
43 XY 1.9292E+00
44 XZ 1.9292E+00
45 YZ 1.9292E+00
C4 46 1 S 3.047525E+03 1.8347E-03 5.3635E-01 5.3635E-01
C4 46 2 S 4.573695E+02 1.4037E-02 9.8945E-01 9.8945E-01
C4 46 3 S 1.039487E+02 6.8843E-02 1.5973E+00 1.5973E+00
C4 46 4 S 2.921016E+01 2.3218E-01 2.0792E+00 2.0792E+00
C4 46 5 S 9.286663E+00 4.6794E-01 1.7742E+00 1.7742E+00
C4 46 6 S 3.163927E+00 3.6231E-01 6.1258E-01 6.1258E-01
C4 47 7 S 7.868272E+00 -1.1933E-01 -3.9956E-01 -3.9956E-01
C4 47 8 S 1.881289E+00 -1.6085E-01 -1.8416E-01 -1.8416E-01
C4 47 9 S 5.442493E-01 1.1435E+00 5.1639E-01 5.1639E-01
C4 48 10 X 7.868272E+00 6.8999E-02 1.2961E+00 1.2961E+00
49 Y 1.2961E+00
50 Z 1.2961E+00
C4 48 11 X 1.881289E+00 3.1642E-01 9.9375E-01 9.9375E-01
49 Y 9.9375E-01
50 Z 9.9375E-01
C4 48 12 X 5.442493E-01 7.4431E-01 4.9595E-01 4.9595E-01
49 Y 4.9595E-01
50 Z 4.9595E-01
C4 51 13 S 1.687145E-01 1.0000E+00 1.8762E-01 1.8762E-01
C4 52 14 X 1.687145E-01 1.0000E+00 1.5413E-01 1.5413E-01
53 Y 1.5413E-01
54 Z 1.5413E-01
C4 55 15 XX 8.000000E-01 1.0000E+00 1.1138E+00 1.1138E+00
56 YY 1.1138E+00
57 ZZ 1.1138E+00
58 XY 1.9292E+00
59 XZ 1.9292E+00
60 YZ 1.9292E+00
O5 61 1 S 5.484672E+03 1.8311E-03 8.3172E-01 8.3172E-01
O5 61 2 S 8.252349E+02 1.3950E-02 1.5308E+00 1.5308E+00
O5 61 3 S 1.880470E+02 6.8445E-02 2.4771E+00 2.4771E+00
O5 61 4 S 5.296450E+01 2.3271E-01 3.2563E+00 3.2563E+00
O5 61 5 S 1.689757E+01 4.7019E-01 2.7929E+00 2.7929E+00
O5 61 6 S 5.799635E+00 3.5852E-01 9.5494E-01 9.5494E-01
O5 62 7 S 1.553962E+01 -1.1078E-01 -6.1793E-01 -6.1793E-01
O5 62 8 S 3.599934E+00 -1.4803E-01 -2.7572E-01 -2.7572E-01
O5 62 9 S 1.013762E+00 1.1308E+00 8.1421E-01 8.1421E-01
O5 63 10 X 1.553962E+01 7.0874E-02 3.1169E+00 3.1169E+00
64 Y 3.1169E+00
65 Z 3.1169E+00
O5 63 11 X 3.599934E+00 3.3975E-01 2.4014E+00 2.4014E+00
64 Y 2.4014E+00
65 Z 2.4014E+00
O5 63 12 X 1.013762E+00 7.2716E-01 1.0544E+00 1.0544E+00
64 Y 1.0544E+00
65 Z 1.0544E+00
O5 66 13 S 2.700058E-01 1.0000E+00 2.6696E-01 2.6696E-01
O5 67 14 X 2.700058E-01 1.0000E+00 2.7743E-01 2.7743E-01
68 Y 2.7743E-01
69 Z 2.7743E-01
O5 70 15 XX 8.000000E-01 1.0000E+00 1.1138E+00 1.1138E+00
71 YY 1.1138E+00
72 ZZ 1.1138E+00
73 XY 1.9292E+00
74 XZ 1.9292E+00
75 YZ 1.9292E+00
C6 76 1 S 3.047525E+03 1.8347E-03 5.3635E-01 5.3635E-01
C6 76 2 S 4.573695E+02 1.4037E-02 9.8945E-01 9.8945E-01
C6 76 3 S 1.039487E+02 6.8843E-02 1.5973E+00 1.5973E+00
C6 76 4 S 2.921016E+01 2.3218E-01 2.0792E+00 2.0792E+00
C6 76 5 S 9.286663E+00 4.6794E-01 1.7742E+00 1.7742E+00
C6 76 6 S 3.163927E+00 3.6231E-01 6.1258E-01 6.1258E-01
C6 77 7 S 7.868272E+00 -1.1933E-01 -3.9956E-01 -3.9956E-01
C6 77 8 S 1.881289E+00 -1.6085E-01 -1.8416E-01 -1.8416E-01
C6 77 9 S 5.442493E-01 1.1435E+00 5.1639E-01 5.1639E-01
C6 78 10 X 7.868272E+00 6.8999E-02 1.2961E+00 1.2961E+00
79 Y 1.2961E+00
80 Z 1.2961E+00
C6 78 11 X 1.881289E+00 3.1642E-01 9.9375E-01 9.9375E-01
79 Y 9.9375E-01
80 Z 9.9375E-01
C6 78 12 X 5.442493E-01 7.4431E-01 4.9595E-01 4.9595E-01
79 Y 4.9595E-01
80 Z 4.9595E-01
C6 81 13 S 1.687145E-01 1.0000E+00 1.8762E-01 1.8762E-01
C6 82 14 X 1.687145E-01 1.0000E+00 1.5413E-01 1.5413E-01
83 Y 1.5413E-01
84 Z 1.5413E-01
C6 85 15 XX 8.000000E-01 1.0000E+00 1.1138E+00 1.1138E+00
86 YY 1.1138E+00
87 ZZ 1.1138E+00
88 XY 1.9292E+00
89 XZ 1.9292E+00
90 YZ 1.9292E+00
C7 91 1 S 3.047525E+03 1.8347E-03 5.3635E-01 5.3635E-01
C7 91 2 S 4.573695E+02 1.4037E-02 9.8945E-01 9.8945E-01
C7 91 3 S 1.039487E+02 6.8843E-02 1.5973E+00 1.5973E+00
C7 91 4 S 2.921016E+01 2.3218E-01 2.0792E+00 2.0792E+00
C7 91 5 S 9.286663E+00 4.6794E-01 1.7742E+00 1.7742E+00
C7 91 6 S 3.163927E+00 3.6231E-01 6.1258E-01 6.1258E-01
C7 92 7 S 7.868272E+00 -1.1933E-01 -3.9956E-01 -3.9956E-01
C7 92 8 S 1.881289E+00 -1.6085E-01 -1.8416E-01 -1.8416E-01
C7 92 9 S 5.442493E-01 1.1435E+00 5.1639E-01 5.1639E-01
C7 93 10 X 7.868272E+00 6.8999E-02 1.2961E+00 1.2961E+00
94 Y 1.2961E+00
95 Z 1.2961E+00
C7 93 11 X 1.881289E+00 3.1642E-01 9.9375E-01 9.9375E-01
94 Y 9.9375E-01
95 Z 9.9375E-01
C7 93 12 X 5.442493E-01 7.4431E-01 4.9595E-01 4.9595E-01
94 Y 4.9595E-01
95 Z 4.9595E-01
C7 96 13 S 1.687145E-01 1.0000E+00 1.8762E-01 1.8762E-01
C7 97 14 X 1.687145E-01 1.0000E+00 1.5413E-01 1.5413E-01
98 Y 1.5413E-01
99 Z 1.5413E-01
C7 100 15 XX 8.000000E-01 1.0000E+00 1.1138E+00 1.1138E+00
101 YY 1.1138E+00
102 ZZ 1.1138E+00
103 XY 1.9292E+00
104 XZ 1.9292E+00
105 YZ 1.9292E+00
C8 106 1 S 3.047525E+03 1.8347E-03 5.3635E-01 5.3635E-01
C8 106 2 S 4.573695E+02 1.4037E-02 9.8945E-01 9.8945E-01
C8 106 3 S 1.039487E+02 6.8843E-02 1.5973E+00 1.5973E+00
C8 106 4 S 2.921016E+01 2.3218E-01 2.0792E+00 2.0792E+00
C8 106 5 S 9.286663E+00 4.6794E-01 1.7742E+00 1.7742E+00
C8 106 6 S 3.163927E+00 3.6231E-01 6.1258E-01 6.1258E-01
C8 107 7 S 7.868272E+00 -1.1933E-01 -3.9956E-01 -3.9956E-01
C8 107 8 S 1.881289E+00 -1.6085E-01 -1.8416E-01 -1.8416E-01
C8 107 9 S 5.442493E-01 1.1435E+00 5.1639E-01 5.1639E-01
C8 108 10 X 7.868272E+00 6.8999E-02 1.2961E+00 1.2961E+00
109 Y 1.2961E+00
110 Z 1.2961E+00
C8 108 11 X 1.881289E+00 3.1642E-01 9.9375E-01 9.9375E-01
109 Y 9.9375E-01
110 Z 9.9375E-01
C8 108 12 X 5.442493E-01 7.4431E-01 4.9595E-01 4.9595E-01
109 Y 4.9595E-01
110 Z 4.9595E-01
C8 111 13 S 1.687145E-01 1.0000E+00 1.8762E-01 1.8762E-01
C8 112 14 X 1.687145E-01 1.0000E+00 1.5413E-01 1.5413E-01
113 Y 1.5413E-01
114 Z 1.5413E-01
C8 115 15 XX 8.000000E-01 1.0000E+00 1.1138E+00 1.1138E+00
116 YY 1.1138E+00
117 ZZ 1.1138E+00
118 XY 1.9292E+00
119 XZ 1.9292E+00
120 YZ 1.9292E+00
C9 121 1 S 3.047525E+03 1.8347E-03 5.3635E-01 5.3635E-01
C9 121 2 S 4.573695E+02 1.4037E-02 9.8945E-01 9.8945E-01
C9 121 3 S 1.039487E+02 6.8843E-02 1.5973E+00 1.5973E+00
C9 121 4 S 2.921016E+01 2.3218E-01 2.0792E+00 2.0792E+00
C9 121 5 S 9.286663E+00 4.6794E-01 1.7742E+00 1.7742E+00
C9 121 6 S 3.163927E+00 3.6231E-01 6.1258E-01 6.1258E-01
C9 122 7 S 7.868272E+00 -1.1933E-01 -3.9956E-01 -3.9956E-01
C9 122 8 S 1.881289E+00 -1.6085E-01 -1.8416E-01 -1.8416E-01
C9 122 9 S 5.442493E-01 1.1435E+00 5.1639E-01 5.1639E-01
C9 123 10 X 7.868272E+00 6.8999E-02 1.2961E+00 1.2961E+00
124 Y 1.2961E+00
125 Z 1.2961E+00
C9 123 11 X 1.881289E+00 3.1642E-01 9.9375E-01 9.9375E-01
124 Y 9.9375E-01
125 Z 9.9375E-01
C9 123 12 X 5.442493E-01 7.4431E-01 4.9595E-01 4.9595E-01
124 Y 4.9595E-01
125 Z 4.9595E-01
C9 126 13 S 1.687145E-01 1.0000E+00 1.8762E-01 1.8762E-01
C9 127 14 X 1.687145E-01 1.0000E+00 1.5413E-01 1.5413E-01
128 Y 1.5413E-01
129 Z 1.5413E-01
C9 130 15 XX 8.000000E-01 1.0000E+00 1.1138E+00 1.1138E+00
131 YY 1.1138E+00
132 ZZ 1.1138E+00
133 XY 1.9292E+00
134 XZ 1.9292E+00
135 YZ 1.9292E+00
C10 136 1 S 3.047525E+03 1.8347E-03 5.3635E-01 5.3635E-01
C10 136 2 S 4.573695E+02 1.4037E-02 9.8945E-01 9.8945E-01
C10 136 3 S 1.039487E+02 6.8843E-02 1.5973E+00 1.5973E+00
C10 136 4 S 2.921016E+01 2.3218E-01 2.0792E+00 2.0792E+00
C10 136 5 S 9.286663E+00 4.6794E-01 1.7742E+00 1.7742E+00
C10 136 6 S 3.163927E+00 3.6231E-01 6.1258E-01 6.1258E-01
C10 137 7 S 7.868272E+00 -1.1933E-01 -3.9956E-01 -3.9956E-01
C10 137 8 S 1.881289E+00 -1.6085E-01 -1.8416E-01 -1.8416E-01
C10 137 9 S 5.442493E-01 1.1435E+00 5.1639E-01 5.1639E-01
C10 138 10 X 7.868272E+00 6.8999E-02 1.2961E+00 1.2961E+00
139 Y 1.2961E+00
140 Z 1.2961E+00
C10 138 11 X 1.881289E+00 3.1642E-01 9.9375E-01 9.9375E-01
139 Y 9.9375E-01
140 Z 9.9375E-01
C10 138 12 X 5.442493E-01 7.4431E-01 4.9595E-01 4.9595E-01
139 Y 4.9595E-01
140 Z 4.9595E-01
C10 141 13 S 1.687145E-01 1.0000E+00 1.8762E-01 1.8762E-01
C10 142 14 X 1.687145E-01 1.0000E+00 1.5413E-01 1.5413E-01
143 Y 1.5413E-01
144 Z 1.5413E-01
C10 145 15 XX 8.000000E-01 1.0000E+00 1.1138E+00 1.1138E+00
146 YY 1.1138E+00
147 ZZ 1.1138E+00
148 XY 1.9292E+00
149 XZ 1.9292E+00
150 YZ 1.9292E+00
C11 151 1 S 3.047525E+03 1.8347E-03 5.3635E-01 5.3635E-01
C11 151 2 S 4.573695E+02 1.4037E-02 9.8945E-01 9.8945E-01
C11 151 3 S 1.039487E+02 6.8843E-02 1.5973E+00 1.5973E+00
C11 151 4 S 2.921016E+01 2.3218E-01 2.0792E+00 2.0792E+00
C11 151 5 S 9.286663E+00 4.6794E-01 1.7742E+00 1.7742E+00
C11 151 6 S 3.163927E+00 3.6231E-01 6.1258E-01 6.1258E-01
C11 152 7 S 7.868272E+00 -1.1933E-01 -3.9956E-01 -3.9956E-01
C11 152 8 S 1.881289E+00 -1.6085E-01 -1.8416E-01 -1.8416E-01
C11 152 9 S 5.442493E-01 1.1435E+00 5.1639E-01 5.1639E-01
C11 153 10 X 7.868272E+00 6.8999E-02 1.2961E+00 1.2961E+00
154 Y 1.2961E+00
155 Z 1.2961E+00
C11 153 11 X 1.881289E+00 3.1642E-01 9.9375E-01 9.9375E-01
154 Y 9.9375E-01
155 Z 9.9375E-01
C11 153 12 X 5.442493E-01 7.4431E-01 4.9595E-01 4.9595E-01
154 Y 4.9595E-01
155 Z 4.9595E-01
C11 156 13 S 1.687145E-01 1.0000E+00 1.8762E-01 1.8762E-01
C11 157 14 X 1.687145E-01 1.0000E+00 1.5413E-01 1.5413E-01
158 Y 1.5413E-01
159 Z 1.5413E-01
C11 160 15 XX 8.000000E-01 1.0000E+00 1.1138E+00 1.1138E+00
161 YY 1.1138E+00
162 ZZ 1.1138E+00
163 XY 1.9292E+00
164 XZ 1.9292E+00
165 YZ 1.9292E+00
O12 166 1 S 5.484672E+03 1.8311E-03 8.3172E-01 8.3172E-01
O12 166 2 S 8.252349E+02 1.3950E-02 1.5308E+00 1.5308E+00
O12 166 3 S 1.880470E+02 6.8445E-02 2.4771E+00 2.4771E+00
O12 166 4 S 5.296450E+01 2.3271E-01 3.2563E+00 3.2563E+00
O12 166 5 S 1.689757E+01 4.7019E-01 2.7929E+00 2.7929E+00
O12 166 6 S 5.799635E+00 3.5852E-01 9.5494E-01 9.5494E-01
O12 167 7 S 1.553962E+01 -1.1078E-01 -6.1793E-01 -6.1793E-01
O12 167 8 S 3.599934E+00 -1.4803E-01 -2.7572E-01 -2.7572E-01
O12 167 9 S 1.013762E+00 1.1308E+00 8.1421E-01 8.1421E-01
O12 168 10 X 1.553962E+01 7.0874E-02 3.1169E+00 3.1169E+00
169 Y 3.1169E+00
170 Z 3.1169E+00
O12 168 11 X 3.599934E+00 3.3975E-01 2.4014E+00 2.4014E+00
169 Y 2.4014E+00
170 Z 2.4014E+00
O12 168 12 X 1.013762E+00 7.2716E-01 1.0544E+00 1.0544E+00
169 Y 1.0544E+00
170 Z 1.0544E+00
O12 171 13 S 2.700058E-01 1.0000E+00 2.6696E-01 2.6696E-01
O12 172 14 X 2.700058E-01 1.0000E+00 2.7743E-01 2.7743E-01
173 Y 2.7743E-01
174 Z 2.7743E-01
O12 175 15 XX 8.000000E-01 1.0000E+00 1.1138E+00 1.1138E+00
176 YY 1.1138E+00
177 ZZ 1.1138E+00
178 XY 1.9292E+00
179 XZ 1.9292E+00
180 YZ 1.9292E+00
C13 181 1 S 3.047525E+03 1.8347E-03 5.3635E-01 5.3635E-01
C13 181 2 S 4.573695E+02 1.4037E-02 9.8945E-01 9.8945E-01
C13 181 3 S 1.039487E+02 6.8843E-02 1.5973E+00 1.5973E+00
C13 181 4 S 2.921016E+01 2.3218E-01 2.0792E+00 2.0792E+00
C13 181 5 S 9.286663E+00 4.6794E-01 1.7742E+00 1.7742E+00
C13 181 6 S 3.163927E+00 3.6231E-01 6.1258E-01 6.1258E-01
C13 182 7 S 7.868272E+00 -1.1933E-01 -3.9956E-01 -3.9956E-01
C13 182 8 S 1.881289E+00 -1.6085E-01 -1.8416E-01 -1.8416E-01
C13 182 9 S 5.442493E-01 1.1435E+00 5.1639E-01 5.1639E-01
C13 183 10 X 7.868272E+00 6.8999E-02 1.2961E+00 1.2961E+00
184 Y 1.2961E+00
185 Z 1.2961E+00
C13 183 11 X 1.881289E+00 3.1642E-01 9.9375E-01 9.9375E-01
184 Y 9.9375E-01
185 Z 9.9375E-01
C13 183 12 X 5.442493E-01 7.4431E-01 4.9595E-01 4.9595E-01
184 Y 4.9595E-01
185 Z 4.9595E-01
C13 186 13 S 1.687145E-01 1.0000E+00 1.8762E-01 1.8762E-01
C13 187 14 X 1.687145E-01 1.0000E+00 1.5413E-01 1.5413E-01
188 Y 1.5413E-01
189 Z 1.5413E-01
C13 190 15 XX 8.000000E-01 1.0000E+00 1.1138E+00 1.1138E+00
191 YY 1.1138E+00
192 ZZ 1.1138E+00
193 XY 1.9292E+00
194 XZ 1.9292E+00
195 YZ 1.9292E+00
O14 196 1 S 5.484672E+03 1.8311E-03 8.3172E-01 8.3172E-01
O14 196 2 S 8.252349E+02 1.3950E-02 1.5308E+00 1.5308E+00
O14 196 3 S 1.880470E+02 6.8445E-02 2.4771E+00 2.4771E+00
O14 196 4 S 5.296450E+01 2.3271E-01 3.2563E+00 3.2563E+00
O14 196 5 S 1.689757E+01 4.7019E-01 2.7929E+00 2.7929E+00
O14 196 6 S 5.799635E+00 3.5852E-01 9.5494E-01 9.5494E-01
O14 197 7 S 1.553962E+01 -1.1078E-01 -6.1793E-01 -6.1793E-01
O14 197 8 S 3.599934E+00 -1.4803E-01 -2.7572E-01 -2.7572E-01
O14 197 9 S 1.013762E+00 1.1308E+00 8.1421E-01 8.1421E-01
O14 198 10 X 1.553962E+01 7.0874E-02 3.1169E+00 3.1169E+00
199 Y 3.1169E+00
200 Z 3.1169E+00
O14 198 11 X 3.599934E+00 3.3975E-01 2.4014E+00 2.4014E+00
199 Y 2.4014E+00
200 Z 2.4014E+00
O14 198 12 X 1.013762E+00 7.2716E-01 1.0544E+00 1.0544E+00
199 Y 1.0544E+00
200 Z 1.0544E+00
O14 201 13 S 2.700058E-01 1.0000E+00 2.6696E-01 2.6696E-01
O14 202 14 X 2.700058E-01 1.0000E+00 2.7743E-01 2.7743E-01
203 Y 2.7743E-01
204 Z 2.7743E-01
O14 205 15 XX 8.000000E-01 1.0000E+00 1.1138E+00 1.1138E+00
206 YY 1.1138E+00
207 ZZ 1.1138E+00
208 XY 1.9292E+00
209 XZ 1.9292E+00
210 YZ 1.9292E+00
C15 211 1 S 3.047525E+03 1.8347E-03 5.3635E-01 5.3635E-01
C15 211 2 S 4.573695E+02 1.4037E-02 9.8945E-01 9.8945E-01
C15 211 3 S 1.039487E+02 6.8843E-02 1.5973E+00 1.5973E+00
C15 211 4 S 2.921016E+01 2.3218E-01 2.0792E+00 2.0792E+00
C15 211 5 S 9.286663E+00 4.6794E-01 1.7742E+00 1.7742E+00
C15 211 6 S 3.163927E+00 3.6231E-01 6.1258E-01 6.1258E-01
C15 212 7 S 7.868272E+00 -1.1933E-01 -3.9956E-01 -3.9956E-01
C15 212 8 S 1.881289E+00 -1.6085E-01 -1.8416E-01 -1.8416E-01
C15 212 9 S 5.442493E-01 1.1435E+00 5.1639E-01 5.1639E-01
C15 213 10 X 7.868272E+00 6.8999E-02 1.2961E+00 1.2961E+00
214 Y 1.2961E+00
215 Z 1.2961E+00
C15 213 11 X 1.881289E+00 3.1642E-01 9.9375E-01 9.9375E-01
214 Y 9.9375E-01
215 Z 9.9375E-01
C15 213 12 X 5.442493E-01 7.4431E-01 4.9595E-01 4.9595E-01
214 Y 4.9595E-01
215 Z 4.9595E-01
C15 216 13 S 1.687145E-01 1.0000E+00 1.8762E-01 1.8762E-01
C15 217 14 X 1.687145E-01 1.0000E+00 1.5413E-01 1.5413E-01
218 Y 1.5413E-01
219 Z 1.5413E-01
C15 220 15 XX 8.000000E-01 1.0000E+00 1.1138E+00 1.1138E+00
221 YY 1.1138E+00
222 ZZ 1.1138E+00
223 XY 1.9292E+00
224 XZ 1.9292E+00
225 YZ 1.9292E+00
C16 226 1 S 3.047525E+03 1.8347E-03 5.3635E-01 5.3635E-01
C16 226 2 S 4.573695E+02 1.4037E-02 9.8945E-01 9.8945E-01
C16 226 3 S 1.039487E+02 6.8843E-02 1.5973E+00 1.5973E+00
C16 226 4 S 2.921016E+01 2.3218E-01 2.0792E+00 2.0792E+00
C16 226 5 S 9.286663E+00 4.6794E-01 1.7742E+00 1.7742E+00
C16 226 6 S 3.163927E+00 3.6231E-01 6.1258E-01 6.1258E-01
C16 227 7 S 7.868272E+00 -1.1933E-01 -3.9956E-01 -3.9956E-01
C16 227 8 S 1.881289E+00 -1.6085E-01 -1.8416E-01 -1.8416E-01
C16 227 9 S 5.442493E-01 1.1435E+00 5.1639E-01 5.1639E-01
C16 228 10 X 7.868272E+00 6.8999E-02 1.2961E+00 1.2961E+00
229 Y 1.2961E+00
230 Z 1.2961E+00
C16 228 11 X 1.881289E+00 3.1642E-01 9.9375E-01 9.9375E-01
229 Y 9.9375E-01
230 Z 9.9375E-01
C16 228 12 X 5.442493E-01 7.4431E-01 4.9595E-01 4.9595E-01
229 Y 4.9595E-01
230 Z 4.9595E-01
C16 231 13 S 1.687145E-01 1.0000E+00 1.8762E-01 1.8762E-01
C16 232 14 X 1.687145E-01 1.0000E+00 1.5413E-01 1.5413E-01
233 Y 1.5413E-01
234 Z 1.5413E-01
C16 235 15 XX 8.000000E-01 1.0000E+00 1.1138E+00 1.1138E+00
236 YY 1.1138E+00
237 ZZ 1.1138E+00
238 XY 1.9292E+00
239 XZ 1.9292E+00
240 YZ 1.9292E+00
C17 241 1 S 3.047525E+03 1.8347E-03 5.3635E-01 5.3635E-01
C17 241 2 S 4.573695E+02 1.4037E-02 9.8945E-01 9.8945E-01
C17 241 3 S 1.039487E+02 6.8843E-02 1.5973E+00 1.5973E+00
C17 241 4 S 2.921016E+01 2.3218E-01 2.0792E+00 2.0792E+00
C17 241 5 S 9.286663E+00 4.6794E-01 1.7742E+00 1.7742E+00
C17 241 6 S 3.163927E+00 3.6231E-01 6.1258E-01 6.1258E-01
C17 242 7 S 7.868272E+00 -1.1933E-01 -3.9956E-01 -3.9956E-01
C17 242 8 S 1.881289E+00 -1.6085E-01 -1.8416E-01 -1.8416E-01
C17 242 9 S 5.442493E-01 1.1435E+00 5.1639E-01 5.1639E-01
C17 243 10 X 7.868272E+00 6.8999E-02 1.2961E+00 1.2961E+00
244 Y 1.2961E+00
245 Z 1.2961E+00
C17 243 11 X 1.881289E+00 3.1642E-01 9.9375E-01 9.9375E-01
244 Y 9.9375E-01
245 Z 9.9375E-01
C17 243 12 X 5.442493E-01 7.4431E-01 4.9595E-01 4.9595E-01
244 Y 4.9595E-01
245 Z 4.9595E-01
C17 246 13 S 1.687145E-01 1.0000E+00 1.8762E-01 1.8762E-01
C17 247 14 X 1.687145E-01 1.0000E+00 1.5413E-01 1.5413E-01
248 Y 1.5413E-01
249 Z 1.5413E-01
C17 250 15 XX 8.000000E-01 1.0000E+00 1.1138E+00 1.1138E+00
251 YY 1.1138E+00
252 ZZ 1.1138E+00
253 XY 1.9292E+00
254 XZ 1.9292E+00
255 YZ 1.9292E+00
C18 256 1 S 3.047525E+03 1.8347E-03 5.3635E-01 5.3635E-01
C18 256 2 S 4.573695E+02 1.4037E-02 9.8945E-01 9.8945E-01
C18 256 3 S 1.039487E+02 6.8843E-02 1.5973E+00 1.5973E+00
C18 256 4 S 2.921016E+01 2.3218E-01 2.0792E+00 2.0792E+00
C18 256 5 S 9.286663E+00 4.6794E-01 1.7742E+00 1.7742E+00
C18 256 6 S 3.163927E+00 3.6231E-01 6.1258E-01 6.1258E-01
C18 257 7 S 7.868272E+00 -1.1933E-01 -3.9956E-01 -3.9956E-01
C18 257 8 S 1.881289E+00 -1.6085E-01 -1.8416E-01 -1.8416E-01
C18 257 9 S 5.442493E-01 1.1435E+00 5.1639E-01 5.1639E-01
C18 258 10 X 7.868272E+00 6.8999E-02 1.2961E+00 1.2961E+00
259 Y 1.2961E+00
260 Z 1.2961E+00
C18 258 11 X 1.881289E+00 3.1642E-01 9.9375E-01 9.9375E-01
259 Y 9.9375E-01
260 Z 9.9375E-01
C18 258 12 X 5.442493E-01 7.4431E-01 4.9595E-01 4.9595E-01
259 Y 4.9595E-01
260 Z 4.9595E-01
C18 261 13 S 1.687145E-01 1.0000E+00 1.8762E-01 1.8762E-01
C18 262 14 X 1.687145E-01 1.0000E+00 1.5413E-01 1.5413E-01
263 Y 1.5413E-01
264 Z 1.5413E-01
C18 265 15 XX 8.000000E-01 1.0000E+00 1.1138E+00 1.1138E+00
266 YY 1.1138E+00
267 ZZ 1.1138E+00
268 XY 1.9292E+00
269 XZ 1.9292E+00
270 YZ 1.9292E+00
C19 271 1 S 3.047525E+03 1.8347E-03 5.3635E-01 5.3635E-01
C19 271 2 S 4.573695E+02 1.4037E-02 9.8945E-01 9.8945E-01
C19 271 3 S 1.039487E+02 6.8843E-02 1.5973E+00 1.5973E+00
C19 271 4 S 2.921016E+01 2.3218E-01 2.0792E+00 2.0792E+00
C19 271 5 S 9.286663E+00 4.6794E-01 1.7742E+00 1.7742E+00
C19 271 6 S 3.163927E+00 3.6231E-01 6.1258E-01 6.1258E-01
C19 272 7 S 7.868272E+00 -1.1933E-01 -3.9956E-01 -3.9956E-01
C19 272 8 S 1.881289E+00 -1.6085E-01 -1.8416E-01 -1.8416E-01
C19 272 9 S 5.442493E-01 1.1435E+00 5.1639E-01 5.1639E-01
C19 273 10 X 7.868272E+00 6.8999E-02 1.2961E+00 1.2961E+00
274 Y 1.2961E+00
275 Z 1.2961E+00
C19 273 11 X 1.881289E+00 3.1642E-01 9.9375E-01 9.9375E-01
274 Y 9.9375E-01
275 Z 9.9375E-01
C19 273 12 X 5.442493E-01 7.4431E-01 4.9595E-01 4.9595E-01
274 Y 4.9595E-01
275 Z 4.9595E-01
C19 276 13 S 1.687145E-01 1.0000E+00 1.8762E-01 1.8762E-01
C19 277 14 X 1.687145E-01 1.0000E+00 1.5413E-01 1.5413E-01
278 Y 1.5413E-01
279 Z 1.5413E-01
C19 280 15 XX 8.000000E-01 1.0000E+00 1.1138E+00 1.1138E+00
281 YY 1.1138E+00
282 ZZ 1.1138E+00
283 XY 1.9292E+00
284 XZ 1.9292E+00
285 YZ 1.9292E+00
C20 286 1 S 3.047525E+03 1.8347E-03 5.3635E-01 5.3635E-01
C20 286 2 S 4.573695E+02 1.4037E-02 9.8945E-01 9.8945E-01
C20 286 3 S 1.039487E+02 6.8843E-02 1.5973E+00 1.5973E+00
C20 286 4 S 2.921016E+01 2.3218E-01 2.0792E+00 2.0792E+00
C20 286 5 S 9.286663E+00 4.6794E-01 1.7742E+00 1.7742E+00
C20 286 6 S 3.163927E+00 3.6231E-01 6.1258E-01 6.1258E-01
C20 287 7 S 7.868272E+00 -1.1933E-01 -3.9956E-01 -3.9956E-01
C20 287 8 S 1.881289E+00 -1.6085E-01 -1.8416E-01 -1.8416E-01
C20 287 9 S 5.442493E-01 1.1435E+00 5.1639E-01 5.1639E-01
C20 288 10 X 7.868272E+00 6.8999E-02 1.2961E+00 1.2961E+00
289 Y 1.2961E+00
290 Z 1.2961E+00
C20 288 11 X 1.881289E+00 3.1642E-01 9.9375E-01 9.9375E-01
289 Y 9.9375E-01
290 Z 9.9375E-01
C20 288 12 X 5.442493E-01 7.4431E-01 4.9595E-01 4.9595E-01
289 Y 4.9595E-01
290 Z 4.9595E-01
C20 291 13 S 1.687145E-01 1.0000E+00 1.8762E-01 1.8762E-01
C20 292 14 X 1.687145E-01 1.0000E+00 1.5413E-01 1.5413E-01
293 Y 1.5413E-01
294 Z 1.5413E-01
C20 295 15 XX 8.000000E-01 1.0000E+00 1.1138E+00 1.1138E+00
296 YY 1.1138E+00
297 ZZ 1.1138E+00
298 XY 1.9292E+00
299 XZ 1.9292E+00
300 YZ 1.9292E+00
O21 301 1 S 5.484672E+03 1.8311E-03 8.3172E-01 8.3172E-01
O21 301 2 S 8.252349E+02 1.3950E-02 1.5308E+00 1.5308E+00
O21 301 3 S 1.880470E+02 6.8445E-02 2.4771E+00 2.4771E+00
O21 301 4 S 5.296450E+01 2.3271E-01 3.2563E+00 3.2563E+00
O21 301 5 S 1.689757E+01 4.7019E-01 2.7929E+00 2.7929E+00
O21 301 6 S 5.799635E+00 3.5852E-01 9.5494E-01 9.5494E-01
O21 302 7 S 1.553962E+01 -1.1078E-01 -6.1793E-01 -6.1793E-01
O21 302 8 S 3.599934E+00 -1.4803E-01 -2.7572E-01 -2.7572E-01
O21 302 9 S 1.013762E+00 1.1308E+00 8.1421E-01 8.1421E-01
O21 303 10 X 1.553962E+01 7.0874E-02 3.1169E+00 3.1169E+00
304 Y 3.1169E+00
305 Z 3.1169E+00
O21 303 11 X 3.599934E+00 3.3975E-01 2.4014E+00 2.4014E+00
304 Y 2.4014E+00
305 Z 2.4014E+00
O21 303 12 X 1.013762E+00 7.2716E-01 1.0544E+00 1.0544E+00
304 Y 1.0544E+00
305 Z 1.0544E+00
O21 306 13 S 2.700058E-01 1.0000E+00 2.6696E-01 2.6696E-01
O21 307 14 X 2.700058E-01 1.0000E+00 2.7743E-01 2.7743E-01
308 Y 2.7743E-01
309 Z 2.7743E-01
O21 310 15 XX 8.000000E-01 1.0000E+00 1.1138E+00 1.1138E+00
311 YY 1.1138E+00
312 ZZ 1.1138E+00
313 XY 1.9292E+00
314 XZ 1.9292E+00
315 YZ 1.9292E+00
H22 316 1 S 1.873114E+01 3.3495E-02 2.1494E-01 2.1494E-01
H22 316 2 S 2.825394E+00 2.3473E-01 3.6457E-01 3.6457E-01
H22 316 3 S 6.401217E-01 8.1376E-01 4.1505E-01 4.1505E-01
H22 317 4 S 1.612778E-01 1.0000E+00 1.8138E-01 1.8138E-01
H22 318 5 X 1.100000E+00 1.0000E+00 1.6058E+00 1.6058E+00
319 Y 1.6058E+00
320 Z 1.6058E+00
H23 321 1 S 1.873114E+01 3.3495E-02 2.1494E-01 2.1494E-01
H23 321 2 S 2.825394E+00 2.3473E-01 3.6457E-01 3.6457E-01
H23 321 3 S 6.401217E-01 8.1376E-01 4.1505E-01 4.1505E-01
H23 322 4 S 1.612778E-01 1.0000E+00 1.8138E-01 1.8138E-01
H23 323 5 X 1.100000E+00 1.0000E+00 1.6058E+00 1.6058E+00
324 Y 1.6058E+00
325 Z 1.6058E+00
H24 326 1 S 1.873114E+01 3.3495E-02 2.1494E-01 2.1494E-01
H24 326 2 S 2.825394E+00 2.3473E-01 3.6457E-01 3.6457E-01
H24 326 3 S 6.401217E-01 8.1376E-01 4.1505E-01 4.1505E-01
H24 327 4 S 1.612778E-01 1.0000E+00 1.8138E-01 1.8138E-01
H24 328 5 X 1.100000E+00 1.0000E+00 1.6058E+00 1.6058E+00
329 Y 1.6058E+00
330 Z 1.6058E+00
H25 331 1 S 1.873114E+01 3.3495E-02 2.1494E-01 2.1494E-01
H25 331 2 S 2.825394E+00 2.3473E-01 3.6457E-01 3.6457E-01
H25 331 3 S 6.401217E-01 8.1376E-01 4.1505E-01 4.1505E-01
H25 332 4 S 1.612778E-01 1.0000E+00 1.8138E-01 1.8138E-01
H25 333 5 X 1.100000E+00 1.0000E+00 1.6058E+00 1.6058E+00
334 Y 1.6058E+00
335 Z 1.6058E+00
H26 336 1 S 1.873114E+01 3.3495E-02 2.1494E-01 2.1494E-01
H26 336 2 S 2.825394E+00 2.3473E-01 3.6457E-01 3.6457E-01
H26 336 3 S 6.401217E-01 8.1376E-01 4.1505E-01 4.1505E-01
H26 337 4 S 1.612778E-01 1.0000E+00 1.8138E-01 1.8138E-01
H26 338 5 X 1.100000E+00 1.0000E+00 1.6058E+00 1.6058E+00
339 Y 1.6058E+00
340 Z 1.6058E+00
H27 341 1 S 1.873114E+01 3.3495E-02 2.1494E-01 2.1494E-01
H27 341 2 S 2.825394E+00 2.3473E-01 3.6457E-01 3.6457E-01
H27 341 3 S 6.401217E-01 8.1376E-01 4.1505E-01 4.1505E-01
H27 342 4 S 1.612778E-01 1.0000E+00 1.8138E-01 1.8138E-01
H27 343 5 X 1.100000E+00 1.0000E+00 1.6058E+00 1.6058E+00
344 Y 1.6058E+00
345 Z 1.6058E+00
H28 346 1 S 1.873114E+01 3.3495E-02 2.1494E-01 2.1494E-01
H28 346 2 S 2.825394E+00 2.3473E-01 3.6457E-01 3.6457E-01
H28 346 3 S 6.401217E-01 8.1376E-01 4.1505E-01 4.1505E-01
H28 347 4 S 1.612778E-01 1.0000E+00 1.8138E-01 1.8138E-01
H28 348 5 X 1.100000E+00 1.0000E+00 1.6058E+00 1.6058E+00
349 Y 1.6058E+00
350 Z 1.6058E+00
H29 351 1 S 1.873114E+01 3.3495E-02 2.1494E-01 2.1494E-01
H29 351 2 S 2.825394E+00 2.3473E-01 3.6457E-01 3.6457E-01
H29 351 3 S 6.401217E-01 8.1376E-01 4.1505E-01 4.1505E-01
H29 352 4 S 1.612778E-01 1.0000E+00 1.8138E-01 1.8138E-01
H29 353 5 X 1.100000E+00 1.0000E+00 1.6058E+00 1.6058E+00
354 Y 1.6058E+00
355 Z 1.6058E+00
H30 356 1 S 1.873114E+01 3.3495E-02 2.1494E-01 2.1494E-01
H30 356 2 S 2.825394E+00 2.3473E-01 3.6457E-01 3.6457E-01
H30 356 3 S 6.401217E-01 8.1376E-01 4.1505E-01 4.1505E-01
H30 357 4 S 1.612778E-01 1.0000E+00 1.8138E-01 1.8138E-01
H30 358 5 X 1.100000E+00 1.0000E+00 1.6058E+00 1.6058E+00
359 Y 1.6058E+00
360 Z 1.6058E+00
H31 361 1 S 1.873114E+01 3.3495E-02 2.1494E-01 2.1494E-01
H31 361 2 S 2.825394E+00 2.3473E-01 3.6457E-01 3.6457E-01
H31 361 3 S 6.401217E-01 8.1376E-01 4.1505E-01 4.1505E-01
H31 362 4 S 1.612778E-01 1.0000E+00 1.8138E-01 1.8138E-01
H31 363 5 X 1.100000E+00 1.0000E+00 1.6058E+00 1.6058E+00
364 Y 1.6058E+00
365 Z 1.6058E+00
H32 366 1 S 1.873114E+01 3.3495E-02 2.1494E-01 2.1494E-01
H32 366 2 S 2.825394E+00 2.3473E-01 3.6457E-01 3.6457E-01
H32 366 3 S 6.401217E-01 8.1376E-01 4.1505E-01 4.1505E-01
H32 367 4 S 1.612778E-01 1.0000E+00 1.8138E-01 1.8138E-01
H32 368 5 X 1.100000E+00 1.0000E+00 1.6058E+00 1.6058E+00
369 Y 1.6058E+00
370 Z 1.6058E+00
H33 371 1 S 1.873114E+01 3.3495E-02 2.1494E-01 2.1494E-01
H33 371 2 S 2.825394E+00 2.3473E-01 3.6457E-01 3.6457E-01
H33 371 3 S 6.401217E-01 8.1376E-01 4.1505E-01 4.1505E-01
H33 372 4 S 1.612778E-01 1.0000E+00 1.8138E-01 1.8138E-01
H33 373 5 X 1.100000E+00 1.0000E+00 1.6058E+00 1.6058E+00
374 Y 1.6058E+00
375 Z 1.6058E+00
Effective Core Potential
Atom Electrons represented by ECP
C1 0
C2 0
O3 0
C4 0
O5 0
C6 0
C7 0
C8 0
C9 0
C10 0
C11 0
O12 0
C13 0
O14 0
C15 0
C16 0
C17 0
C18 0
C19 0
C20 0
O21 0
H22 0
H23 0
H24 0
H25 0
H26 0
H27 0
H28 0
H29 0
H30 0
H31 0
H32 0
H33 0
Input geometry:
bohr
atom x y z
C1 7.3624636898 0.0394499226 0.3982578911
C2 6.8879043270 -2.5897071379 -0.2397703405
O3 9.1036176571 -3.8804902367 -0.6914564583
C4 10.8101216062 -1.7026016646 -0.8885567829
O5 9.9077622637 0.5848588973 0.3951114971
C6 5.4535303885 1.7366545294 0.9418470596
C7 2.8718545867 0.6529022659 0.8160555504
C8 2.4073258901 -1.8340755803 0.2217385738
C9 4.4906620155 -3.6182718396 -0.3546316738
C10 0.3310932452 1.8983319378 1.2712130951
C11 -1.3101962553 -0.5199052310 1.6074709618
O12 -0.1195591925 -2.5381686373 0.1939803867
C13 -0.5146499026 3.3757878524 -1.1014325411
O14 -3.0656441111 4.2332208460 -0.7680054842
C15 -4.8296467570 2.3119759790 -0.3702729369
C16 -4.0518921757 -0.1194212425 0.7895445826
C17 -7.3503675529 2.6906789842 -1.0742412719
C18 -9.2621826866 0.6803429790 -0.6983652970
C19 -8.5211624915 -1.6498688571 0.3811445313
C20 -5.8558587497 -2.0565303603 1.1405082979
O21 -11.7608881732 1.1306552659 -1.4231243988
H22 10.9422342494 -1.2326966972 -2.9168319582
H23 12.7204627535 -2.2050817310 -0.2363688334
H24 5.8176919511 3.6945657525 1.4198854083
H25 4.1555587715 -5.5813061102 -0.8292666257
H26 0.3172698986 3.1193161125 2.9586704946
H27 -1.2823813765 -1.0709512587 3.6190957602
H28 0.7116935354 5.0342322867 -1.3751593703
H29 -0.3940324635 2.1776429077 -2.8024525050
H30 -7.9119582525 4.4735297584 -1.9108683809
H31 -9.8856581373 -3.1527963902 0.6667652968
H32 -5.2929528008 -3.8447007136 1.9721011765
H33 -12.8820211091 -0.2379448650 -1.1123929527
angstroms
atom x y z
C1 3.8960480000 0.0208760000 0.2107490000
C2 3.6449220000 -1.3704140000 -0.1268810000
O3 4.8174270000 -2.0534670000 -0.3659030000
C4 5.7204700000 -0.9009780000 -0.4702040000
O5 5.2429620000 0.3094940000 0.2090840000
C6 2.8858840000 0.9189980000 0.4984040000
C7 1.5197200000 0.3455010000 0.4318380000
C8 1.2739020000 -0.9705510000 0.1173390000
C9 2.3763560000 -1.9147070000 -0.1876630000
C10 0.1752070000 1.0045540000 0.6726970000
C11 -0.6933260000 -0.2751220000 0.8506370000
O12 -0.0632680000 -1.3431410000 0.1026500000
C13 -0.2723410000 1.7863900000 -0.5828530000
O14 -1.6222690000 2.2401240000 -0.4064110000
C15 -2.5557390000 1.2234450000 -0.1959400000
C16 -2.1441690000 -0.0631950000 0.4178090000
C17 -3.8896470000 1.4238460000 -0.5684640000
C18 -4.9013360000 0.3600220000 -0.3695590000
C19 -4.5092050000 -0.8730730000 0.2016930000
C20 -3.0987870000 -1.0882690000 0.6035310000
O21 -6.2235940000 0.5983170000 -0.7530850000
H22 5.7903810000 -0.6523150000 -1.5435210000
H23 6.7313790000 -1.1668790000 -0.1250810000
H24 3.0785900000 1.9550800000 0.7513710000
H25 2.1990270000 -2.9535000000 -0.4388290000
H26 0.1678920000 1.6506710000 1.5656610000
H27 -0.6786070000 -0.5667230000 1.9151430000
H28 0.3766120000 2.6640010000 -0.7277030000
H29 -0.2085130000 1.1523590000 -1.4829940000
H30 -4.1868280000 2.3672900000 -1.0111880000
H31 -5.2312650000 -1.6683880000 0.3528370000
H32 -2.8009100000 -2.0345280000 1.0435910000
H33 -6.8168720000 -0.1259150000 -0.5886530000
principal moments of inertia:
amu*angstrom^2: 447.09709 3713.25707 4026.09301
g*cm^2: 7.42422092E-38 6.16600766E-37 6.68548389E-37
rotational constants:
cm^(-1): 0.03770463 0.00453985 0.00418709
GHz: 1.13035629 0.13610127 0.12552591
number of surviving atom pairs: 498 out of: 561
Connectivity table:
C1 C2 O3 C4 O5 C6 C7
C1 0
C2 1 0
O3 2 1 0
C4 2 2 1 0
O5 1 2 2 1 0
C6 1 2 3 3 2 0
C7 2 3 4 4 4 1 0
C8 3 2 4 4 4 2 1
C9 2 1 2 3 3 3 2
C10 4 4 4 4 4 2 1
C11 4 4 4 4 4 4 2
O12 4 4 4 4 4 4 2
C13 4 4 4 4 4 3 2
O14 4 4 4 4 4 4 4
C15 4 4 4 4 4 4 4
C16 4 4 4 4 4 4 3
C17 4 4 4 4 4 4 4
C18 4 4 4 4 4 4 4
C19 4 4 4 4 4 4 4
C20 4 4 4 4 4 4 4
O21 4 4 4 4 4 4 4
H22 3 3 2 1 2 4 4
H23 3 3 2 1 2 4 4
H24 2 3 4 4 3 1 2
H25 3 2 3 4 4 4 3
H26 4 4 4 4 4 3 2
H27 4 4 4 4 4 4 3
H28 4 4 4 4 4 3 3
H29 4 4 4 4 4 3 3
H30 4 4 4 4 4 4 4
H31 4 4 4 4 4 4 4
H32 4 4 4 4 4 4 4
H33 4 4 4 4 4 4 4
C8 C9 C10 C11 O12 C13 O14
C8 0
C9 1 0
C10 2 4 0
C11 2 3 1 0
O12 1 2 2 1 0
C13 3 4 1 2 3 0
O14 4 4 2 3 4 1 0
C15 4 4 3 2 3 2 1
C16 3 4 2 1 2 3 2
C17 4 4 4 4 4 3 2
C18 4 4 4 4 4 4 4
C19 4 4 4 4 4 4 4
C20 4 4 4 2 3 4 4
O21 4 4 4 4 4 4 4
H22 4 4 4 4 4 4 4
H23 4 4 4 4 4 4 4
H24 3 4 3 4 4 3 4
H25 2 1 4 4 3 4 4
H26 3 4 1 2 3 2 3
H27 3 4 2 1 2 3 4
H28 4 4 2 3 4 1 2
H29 3 4 2 3 3 1 2
H30 4 4 4 4 4 4 3
H31 4 4 4 4 4 4 4
H32 4 4 4 3 3 4 4
H33 4 4 4 4 4 4 4
C15 C16 C17 C18 C19 C20 O21
C15 0
C16 1 0
C17 1 2 0
C18 2 3 1 0
C19 3 2 2 1 0
C20 2 1 3 2 1 0
O21 4 4 2 1 2 4 0
H22 4 4 4 4 4 4 4
H23 4 4 4 4 4 4 4
H24 4 4 4 4 4 4 4
H25 4 4 4 4 4 4 4
H26 3 3 4 4 4 4 4
H27 3 2 4 4 4 3 4
H28 3 4 4 4 4 4 4
H29 3 3 4 4 4 4 4
H30 2 3 1 2 3 4 3
H31 4 3 3 2 1 2 3
H32 3 2 4 3 2 1 4
H33 4 4 3 2 3 4 1
H22 H23 H24 H25 H26 H27 H28
H22 0
H23 2 0
H24 4 4 0
H25 4 4 4 0
H26 4 4 3 4 0
H27 4 4 4 4 3 0
H28 4 4 3 4 3 4 0
H29 4 4 4 4 3 4 2
H30 4 4 4 4 4 4 4
H31 4 4 4 4 4 4 4
H32 4 4 4 4 4 3 4
H33 4 4 4 4 4 4 4
H29 H30 H31 H32 H33
H29 0
H30 4 0
H31 4 4 0
H32 4 4 3 0
H33 4 3 3 4 0
Molecular weight: 284.07 amu
Stoichiometry: C16H12O5
[running at reduced cpu priority]
Molecular Point Group: C1
Point Group used: C1 (symmetry turned off)
number of surviving atom pairs: 498 out of: 561
Connectivity table:
C1 C2 O3 C4 O5 C6 C7
C1 0
C2 1 0
O3 2 1 0
C4 2 2 1 0
O5 1 2 2 1 0
C6 1 2 3 3 2 0
C7 2 3 4 4 4 1 0
C8 3 2 4 4 4 2 1
C9 2 1 2 3 3 3 2
C10 4 4 4 4 4 2 1
C11 4 4 4 4 4 4 2
O12 4 4 4 4 4 4 2
C13 4 4 4 4 4 3 2
O14 4 4 4 4 4 4 4
C15 4 4 4 4 4 4 4
C16 4 4 4 4 4 4 3
C17 4 4 4 4 4 4 4
C18 4 4 4 4 4 4 4
C19 4 4 4 4 4 4 4
C20 4 4 4 4 4 4 4
O21 4 4 4 4 4 4 4
H22 3 3 2 1 2 4 4
H23 3 3 2 1 2 4 4
H24 2 3 4 4 3 1 2
H25 3 2 3 4 4 4 3
H26 4 4 4 4 4 3 2
H27 4 4 4 4 4 4 3
H28 4 4 4 4 4 3 3
H29 4 4 4 4 4 3 3
H30 4 4 4 4 4 4 4
H31 4 4 4 4 4 4 4
H32 4 4 4 4 4 4 4
H33 4 4 4 4 4 4 4
C8 C9 C10 C11 O12 C13 O14
C8 0
C9 1 0
C10 2 4 0
C11 2 3 1 0
O12 1 2 2 1 0
C13 3 4 1 2 3 0
O14 4 4 2 3 4 1 0
C15 4 4 3 2 3 2 1
C16 3 4 2 1 2 3 2
C17 4 4 4 4 4 3 2
C18 4 4 4 4 4 4 4
C19 4 4 4 4 4 4 4
C20 4 4 4 2 3 4 4
O21 4 4 4 4 4 4 4
H22 4 4 4 4 4 4 4
H23 4 4 4 4 4 4 4
H24 3 4 3 4 4 3 4
H25 2 1 4 4 3 4 4
H26 3 4 1 2 3 2 3
H27 3 4 2 1 2 3 4
H28 4 4 2 3 4 1 2
H29 3 4 2 3 3 1 2
H30 4 4 4 4 4 4 3
H31 4 4 4 4 4 4 4
H32 4 4 4 3 3 4 4
H33 4 4 4 4 4 4 4
C15 C16 C17 C18 C19 C20 O21
C15 0
C16 1 0
C17 1 2 0
C18 2 3 1 0
C19 3 2 2 1 0
C20 2 1 3 2 1 0
O21 4 4 2 1 2 4 0
H22 4 4 4 4 4 4 4
H23 4 4 4 4 4 4 4
H24 4 4 4 4 4 4 4
H25 4 4 4 4 4 4 4
H26 3 3 4 4 4 4 4
H27 3 2 4 4 4 3 4
H28 3 4 4 4 4 4 4
H29 3 3 4 4 4 4 4
H30 2 3 1 2 3 4 3
H31 4 3 3 2 1 2 3
H32 3 2 4 3 2 1 4
H33 4 4 3 2 3 4 1
H22 H23 H24 H25 H26 H27 H28
H22 0
H23 2 0
H24 4 4 0
H25 4 4 4 0
H26 4 4 3 4 0
H27 4 4 4 4 3 0
H28 4 4 3 4 3 4 0
H29 4 4 4 4 3 4 2
H30 4 4 4 4 4 4 4
H31 4 4 4 4 4 4 4
H32 4 4 4 4 4 3 4
H33 4 4 4 4 4 4 4
H29 H30 H31 H32 H33
H29 0
H30 4 0
H31 4 4 0
H32 4 4 3 0
H33 4 3 3 4 0
bond lengths (angstroms):
C1 -C2 : 1.453529 C1 -O5 : 1.377491
C1 -C6 : 1.381955 C2 -O3 : 1.377846
C2 -C9 : 1.381741 O3 -C4 : 1.467854
C4 -O5 : 1.467886 C4 -H22 : 1.103961
C4 -H23 : 1.100795 C6 -C7 : 1.483150
C6 -H24 : 1.083787 C7 -C8 : 1.375256
C7 -C10 : 1.516601 C8 -C9 : 1.483193
C8 -O12 : 1.388187 C9 -H25 : 1.083338
C10 -C11 : 1.556786 C10 -C13 : 1.545307
C10 -H26 : 1.102227 C11 -O12 : 1.448144
C11 -C16 : 1.528790 C11 -H27 : 1.103821
C13 -O14 : 1.435030 C13 -H28 : 1.101055
C13 -H29 : 1.102870 O14 -C15 : 1.396174
C15 -C16 : 1.483752 C15 -C17 : 1.399373
C16 -C20 : 1.412999 C17 -C18 : 1.481486
C17 -H30 : 1.083701 C18 -C19 : 1.414432
C18 -O21 : 1.397227 C19 -C20 : 1.482249
C19 -H31 : 1.084777 C20 -H32 : 1.085260
O21 -H33 : 0.950541
bond lengths (bohr):
C1 -C2 : 2.746771 C1 -O5 : 2.603080
C1 -C6 : 2.611517 C2 -O3 : 2.603752
C2 -C9 : 2.611113 O3 -C4 : 2.773843
C4 -O5 : 2.773902 C4 -H22 : 2.086184
C4 -H23 : 2.080202 C6 -C7 : 2.802747
C6 -H24 : 2.048060 C7 -C8 : 2.598857
C7 -C10 : 2.865961 C8 -C9 : 2.802829
C8 -O12 : 2.623293 C9 -H25 : 2.047212
C10 -C11 : 2.941899 C10 -C13 : 2.920206
C10 -H26 : 2.082908 C11 -O12 : 2.736596
C11 -C16 : 2.888994 C11 -H27 : 2.085919
C13 -O14 : 2.711814 C13 -H28 : 2.080693
C13 -H29 : 2.084123 O14 -C15 : 2.638386
C15 -C16 : 2.803885 C15 -C17 : 2.644432
C16 -C20 : 2.670180 C17 -C18 : 2.799602
C17 -H30 : 2.047898 C18 -C19 : 2.672890
C18 -O21 : 2.640376 C19 -C20 : 2.801045
C19 -H31 : 2.049931 C20 -H32 : 2.050844
O21 -H33 : 1.796263
bond angles:
O5 -C1 -C2 : 111.666713 C6 -C1 -C2 : 122.964906
C6 -C1 -O5 : 125.367944 O3 -C2 -C1 : 111.579130
C9 -C2 -C1 : 123.085341 C9 -C2 -O3 : 125.335025
C4 -O3 -C2 : 98.431270 O5 -C4 -O3 : 114.484786
H22 -C4 -O3 : 106.552675 H22 -C4 -O5 : 106.545404
H23 -C4 -O3 : 110.673562 H23 -C4 -O5 : 110.661551
H23 -C4 -H22 : 107.521960 C4 -O5 -C1 : 98.387096
C7 -C6 -C1 : 114.372784 H24 -C6 -C1 : 122.676752
H24 -C6 -C7 : 122.950463 C8 -C7 -C6 : 123.020378
C10 -C7 -C6 : 129.899485 C10 -C7 -C8 : 107.080117
C9 -C8 -C7 : 121.556062 O12 -C8 -C7 : 115.559000
O12 -C8 -C9 : 122.884644 C8 -C9 -C2 : 114.999700
H25 -C9 -C2 : 122.561192 H25 -C9 -C8 : 122.439103
C11 -C10 -C7 : 98.948225 C13 -C10 -C7 : 110.339411
C13 -C10 -C11 : 110.314524 H26 -C10 -C7 : 112.909820
H26 -C10 -C11 : 112.677721 H26 -C10 -C13 : 111.083936
O12 -C11 -C10 : 107.725816 C16 -C11 -C10 : 112.528760
C16 -C11 -O12 : 111.647702 H27 -C11 -C10 : 108.659295
H27 -C11 -O12 : 107.306607 H27 -C11 -C16 : 108.802668
C11 -O12 -C8 : 102.455245 O14 -C13 -C10 : 109.421465
H28 -C13 -C10 : 109.843848 H28 -C13 -O14 : 108.577987
H29 -C13 -C10 : 110.825122 H29 -C13 -O14 : 109.667805
H29 -C13 -H28 : 108.465972 C15 -O14 -C13 : 114.660134
C16 -C15 -O14 : 120.554072 C17 -C15 -O14 : 119.531436
C17 -C15 -C16 : 119.914492 C15 -C16 -C11 : 120.037118
C20 -C16 -C11 : 120.223379 C20 -C16 -C15 : 119.739244
C18 -C17 -C15 : 120.821545 H30 -C17 -C15 : 119.658275
H30 -C17 -C18 : 119.519844 C19 -C18 -C17 : 119.401150
O21 -C18 -C17 : 119.138794 O21 -C18 -C19 : 121.460014
C20 -C19 -C18 : 119.990724 H31 -C19 -C18 : 120.723883
H31 -C19 -C20 : 119.285278 C19 -C20 -C16 : 120.125821
H32 -C20 -C16 : 120.026755 H32 -C20 -C19 : 119.847211
H33 -O21 -C18 : 114.407996
torsional angles:
C1 -C2 -O3 -C4 : -13.285186
C1 -C2 -C9 -C8 : 0.068961
C1 -C2 -C9 -H25 :-179.906380
C1 -O5 -C4 -O3 : -23.349683
C1 -O5 -C4 -H22 : 94.157548
C1 -O5 -C4 -H23 :-149.246670
C1 -C6 -C7 -C8 : 0.312544
C1 -C6 -C7 -C10 :-179.744922
C2 -C1 -O5 -C4 : 13.375530
C2 -C1 -C6 -C7 : -0.101417
C2 -C1 -C6 -H24 : 179.886012
C2 -O3 -C4 -O5 : 23.323125
C2 -O3 -C4 -H22 : -94.179957
C2 -O3 -C4 -H23 : 149.213851
C2 -C9 -C8 -C7 : 0.139147
C2 -C9 -C8 -O12 : 179.933132
O3 -C2 -C1 -O5 : -0.065094
O3 -C2 -C1 -C6 :-179.836158
O3 -C2 -C9 -C8 : 179.788524
O3 -C2 -C9 -H25 : -0.186817
C4 -O3 -C2 -C9 : 166.967490
C4 -O5 -C1 -C6 :-166.860018
O5 -C1 -C2 -C9 : 179.688886
O5 -C1 -C6 -C7 :-179.840504
O5 -C1 -C6 -H24 : 0.146924
C6 -C1 -C2 -C9 : -0.082177
C6 -C7 -C8 -C9 : -0.341958
C6 -C7 -C8 -O12 : 179.849812
C6 -C7 -C10 -C11 :-163.557314
C6 -C7 -C10 -C13 : 80.772536
C6 -C7 -C10 -H26 : -44.199251
C7 -C8 -C9 -H25 :-179.885479
C7 -C8 -O12 -C11 : -17.709951
C7 -C10 -C11 -O12 : -27.371440
C7 -C10 -C11 -C16 :-150.866680
C7 -C10 -C11 -H27 : 88.577941
C7 -C10 -C13 -O14 : 171.824045
C7 -C10 -C13 -H28 : -69.072808
C7 -C10 -C13 -H29 : 50.764719
C8 -C7 -C6 -H24 :-179.674846
C8 -C7 -C10 -C11 : 16.392278
C8 -C7 -C10 -C13 : -99.277872
C8 -C7 -C10 -H26 : 135.750341
C8 -O12 -C11 -C10 : 27.836382
C8 -O12 -C11 -C16 : 151.866484
C8 -O12 -C11 -H27 : -88.997840
C9 -C8 -C7 -C10 : 179.704163
C9 -C8 -O12 -C11 : 162.484643
C10 -C7 -C6 -H24 : 0.267688
C10 -C7 -C8 -O12 : -0.104067
C10 -C11 -C16 -C15 : 4.553476
C10 -C11 -C16 -C20 :-175.260860
C10 -C13 -O14 -C15 : -59.422354
C11 -C10 -C13 -O14 : 63.516500
C11 -C10 -C13 -H28 :-177.380353
C11 -C10 -C13 -H29 : -57.542826
C11 -C16 -C15 -O14 : 1.183450
C11 -C16 -C15 -C17 :-178.816654
C11 -C16 -C20 -C19 : 179.084238
C11 -C16 -C20 -H32 : -0.748021
O12 -C8 -C9 -H25 : -0.091494
O12 -C11 -C10 -C13 : 88.317884
O12 -C11 -C10 -H26 :-146.902287
O12 -C11 -C16 -C15 :-116.729115
O12 -C11 -C16 -C20 : 63.456549
C13 -C10 -C11 -C16 : -35.177356
C13 -C10 -C11 -H27 :-155.732735
C13 -O14 -C15 -C16 : 27.153569
C13 -O14 -C15 -C17 :-152.846328
O14 -C13 -C10 -H26 : -62.169629
O14 -C15 -C16 -C20 :-179.001312
O14 -C15 -C17 -C18 : 179.439585
O14 -C15 -C17 -H30 : -0.348612
C15 -O14 -C13 -H28 :-179.305365
C15 -O14 -C13 -H29 : 62.336077
C15 -C16 -C11 -H27 : 125.026368
C15 -C16 -C20 -C19 : -0.730652
C15 -C16 -C20 -H32 : 179.437089
C15 -C17 -C18 -C19 : -0.136191
C15 -C17 -C18 -O21 : 179.938291
C16 -C11 -C10 -H26 : 89.602472
C16 -C15 -C17 -C18 : -0.560311
C16 -C15 -C17 -H30 : 179.651491
C16 -C20 -C19 -C18 : 0.035767
C16 -C20 -C19 -H31 :-179.842032
C17 -C15 -C16 -C20 : 0.998584
C17 -C18 -C19 -C20 : 0.405288
C17 -C18 -C19 -H31 :-179.718698
C17 -C18 -O21 -H33 :-179.509590
C18 -C19 -C20 -H32 : 179.868328
C19 -C18 -C17 -H30 : 179.652297
C19 -C18 -O21 -H33 : 0.566482
C20 -C16 -C11 -H27 : -54.787968
C20 -C19 -C18 -O21 :-179.670979
O21 -C18 -C17 -H30 : -0.273221
O21 -C18 -C19 -H31 : 0.205034
H26 -C10 -C11 -H27 : -30.952906
H26 -C10 -C13 -H28 : 56.933519
H26 -C10 -C13 -H29 : 176.771045
H31 -C19 -C20 -H32 : -0.009470
nuclear repulsion energy....... 1579.590836389 hartrees
Non-default options chosen:
SCF calculation type: UDFT(b3lyp)
UDFT=Becke_3_Parameter/HF+Slater+Becke88+VWN+LYP (B3LYP)
Molecular symmetry not used
High accuracy cutoffs used in SCF
Electrostatic potential fit to point charges on atomic centers
Molecular orbitals will be written to .vis files
Electron density will be written to .vis file
Spin density will be written to .vis file
Molecular electrostatic potential will be written to .vis file
Average local ionization energy will be written to .vis file
Reduced density gradient and non-covalent bond strength
will be written to .vis files
Mulliken populations computed by atom
Non-default print settings:
1= 2 5= 2 6= 2 8= 2 11= 2 12= 2 18= 2 19= 2 24= 2 25= 2
26= 2 175= 2 192= 2
Temporary integer options set:
73= 2
Copy grid 4 into grid 2
0 1
1 1 1 0 0 0 1 1
1 1 1 1 1 1 1 1
1 1 1 1 1 1 1 1 1 1 1 1 1 1 1 1 1 1
1 1 1 1 1 1 1 1 1 1 1 1 1 1 1 1 1 1
1 1 1
1 1 1 1 1 1 1 1 1 1 1 1 1 1
1 1 1 1 1 1 1 1 1 1 1 1 1 1 1
1 1 1
1 1 1 1 1 1 1 1 1 1 1 1 1 1
Copy daf 4 into daf 2
0 0
0 0 0 0 0 0 0 0
0 0 0 0 0 0 0 0
0 0 0 0 0 0 0 0 0 0 0 0 0 0 0 0 0 0
0 0 0 0 0 0 0 0 0 0 0 0 0 0 0 0 0 0
0 0 0
0 0 0 0 0 0 0 0 0 0 0 0 0 0
0 0 0 0 0 0 0 0 0 0 0 0 0 0 0
0 0 0
0 0 0 0 0 0 0 0 0 0 0 0 0 0
cpu seconds total thru pre user: 0.5 user+sys: 0.5
end of program pre
Time(pre) user: 0.6 user+sys: 0.6 wallclock: 0.6
start of program onee
overlap matrix:
1 2 3 4 5
1 1.000000E+00
2 2.190588E-01 1.000000E+00
3 0.000000E+00 0.000000E+00 1.000000E+00
4 0.000000E+00 0.000000E+00 0.000000E+00 1.000000E+00
5 0.000000E+00 0.000000E+00 0.000000E+00 0.000000E+00 1.000000E+00
6 1.842611E-01 8.122732E-01 0.000000E+00 0.000000E+00 0.000000E+00
7 0.000000E+00 0.000000E+00 5.697543E-01 0.000000E+00 0.000000E+00
8 0.000000E+00 0.000000E+00 0.000000E+00 5.697543E-01 0.000000E+00
9 0.000000E+00 0.000000E+00 0.000000E+00 0.000000E+00 5.697543E-01
10 7.910270E-02 7.102351E-01 0.000000E+00 0.000000E+00 0.000000E+00
11 7.910270E-02 7.102351E-01 0.000000E+00 0.000000E+00 0.000000E+00
12 7.910270E-02 7.102351E-01 0.000000E+00 0.000000E+00 0.000000E+00
13 0.000000E+00 0.000000E+00 0.000000E+00 0.000000E+00 0.000000E+00
14 0.000000E+00 0.000000E+00 0.000000E+00 0.000000E+00 0.000000E+00
15 0.000000E+00 0.000000E+00 0.000000E+00 0.000000E+00 0.000000E+00
16 8.602665E-07 1.156742E-02 -4.700251E-03 -2.604037E-02 -6.319321E-03
17 1.156742E-02 1.541934E-01 -3.916341E-02 -2.169734E-01 -5.265381E-02
18 4.700251E-03 3.916341E-02 7.275764E-02 -6.200678E-02 -1.504744E-02
19 2.604037E-02 2.169734E-01 -6.200678E-02 -2.595806E-01 -8.336592E-02
20 6.319321E-03 5.265381E-02 -1.504744E-02 -8.336592E-02 6.371903E-02
21 5.399566E-02 3.134878E-01 -4.104327E-02 -2.273882E-01 -5.518122E-02
22 2.029422E-02 9.162344E-02 1.980726E-01 -6.918102E-02 -1.678844E-02
23 1.124342E-01 5.076128E-01 -6.918102E-02 -1.727175E-01 -9.301143E-02
24 2.728486E-02 1.231845E-01 -1.678844E-02 -9.301143E-02 1.879882E-01
25 1.424601E-03 7.174189E-02 6.425496E-03 -1.144612E-01 -2.777677E-02
26 2.708300E-02 2.527149E-01 -8.351075E-02 -3.126070E-01 -1.122772E-01
27 2.122432E-03 7.666381E-02 -2.236945E-02 -1.239314E-01 6.340693E-03
28 8.291803E-03 5.848349E-02 1.096447E-01 -8.906980E-02 -2.730729E-02
29 2.012205E-03 1.419243E-02 2.660792E-02 -2.730729E-02 1.683004E-02
30 1.114803E-02 7.862897E-02 -2.730729E-02 -1.197512E-01 9.324191E-02
31 0.000000E+00 1.437495E-05 2.239414E-05 -5.041697E-05 -1.401554E-05
32 9.591677E-08 1.160457E-03 1.260780E-03 -2.838451E-03 -7.890684E-04
33 -1.637857E-07 -9.395931E-04 -5.547482E-04 2.322746E-03 6.457062E-04
34 3.687384E-07 2.115349E-03 2.322746E-03 -4.752339E-03 -1.453708E-03
35 1.025065E-07 5.880514E-04 6.457062E-04 -1.453708E-03 7.284606E-05
36 1.733765E-03 2.947141E-02 1.793208E-02 -4.037132E-02 -1.122293E-02
37 -2.952820E-03 -3.524392E-02 -2.257809E-03 4.970513E-02 1.381766E-02
38 6.647819E-03 7.934625E-02 4.970513E-02 -9.208330E-02 -3.110833E-02
39 1.848044E-03 2.205767E-02 1.381766E-02 -3.110833E-02 1.117227E-02
40 4.212559E-06 3.131579E-03 1.314320E-03 -7.079783E-03 -1.968127E-03
41 2.039740E-05 1.040875E-02 1.048880E-02 -1.949313E-02 -6.564496E-03
42 1.792715E-06 2.043548E-03 2.046649E-03 -4.607715E-03 -1.353602E-04
43 -1.551211E-05 -6.974686E-03 -3.470136E-03 1.426174E-02 4.405316E-03
44 -4.312251E-06 -1.938911E-03 -9.646720E-04 4.405316E-03 -3.605009E-04
45 9.708370E-06 4.365160E-03 4.405316E-03 -8.925816E-03 8.116122E-04
46 0.000000E+00 1.506902E-04 4.382018E-04 -2.214170E-04 -1.635558E-04
47 1.506902E-04 1.408933E-02 2.396593E-02 -1.210964E-02 -8.945118E-03
48 -4.382018E-04 -2.396593E-02 -3.580631E-02 2.130832E-02 1.573998E-02
49 2.214170E-04 1.210964E-02 2.130832E-02 -4.402248E-03 -7.953184E-03
50 1.635558E-04 8.945118E-03 1.573998E-02 -7.953184E-03 4.896968E-04
51 1.243010E-02 9.974983E-02 9.101836E-02 -4.599026E-02 -3.397198E-02
52 -3.392417E-02 -2.127374E-01 -1.360500E-01 1.012203E-01 7.476919E-02
53 1.714139E-02 1.074931E-01 1.012203E-01 1.312785E-02 -3.777979E-02
54 1.266196E-02 7.940277E-02 7.476919E-02 -3.777979E-02 3.636593E-02
55 1.134554E-04 2.206022E-02 3.490240E-02 -2.251735E-02 -1.663306E-02
56 3.017591E-05 8.280078E-03 1.662023E-02 -3.516291E-03 -6.203387E-03
57 1.720311E-05 6.133486E-03 1.226737E-02 -6.198524E-03 -9.727307E-04
58 -9.787276E-05 -1.619488E-02 -2.861234E-02 8.226715E-03 1.225730E-02
59 -7.229643E-05 -1.196280E-02 -2.113530E-02 1.225730E-02 6.873393E-04
60 3.653034E-05 6.044628E-03 1.225730E-02 -3.070565E-03 -3.473026E-04
61 1.147762E-07 9.689146E-03 2.224102E-02 4.765826E-03 -2.749344E-05
62 2.368799E-03 1.025564E-01 1.733256E-01 3.714038E-02 -2.142581E-04
63 -6.214357E-03 -1.325745E-01 -1.953940E-01 -5.258173E-02 3.033372E-04
64 -1.331618E-03 -2.840818E-02 -5.258173E-02 3.872564E-02 6.499938E-05
65 7.681934E-06 1.638831E-04 3.033372E-04 6.499938E-05 4.999253E-02
66 4.514037E-02 2.856667E-01 2.806925E-01 6.014706E-02 -3.469806E-04
67 -1.126826E-01 -4.920780E-01 -3.014518E-01 -1.100721E-01 6.349917E-04
68 -2.414574E-02 -1.054429E-01 -1.100721E-01 1.886430E-01 1.360666E-04
69 1.392937E-04 6.082867E-04 6.349917E-04 1.360666E-04 2.122286E-01
70 4.275030E-02 3.048188E-01 3.706610E-01 1.201361E-01 -6.930498E-04
71 2.845293E-03 9.415476E-02 1.481758E-01 -8.959284E-03 -1.831688E-04
72 9.248850E-04 8.401666E-02 1.283258E-01 2.749777E-02 7.622271E-05
73 1.552334E-02 8.194985E-02 1.251982E-01 -1.301510E-01 -1.983474E-04
74 -8.955213E-05 -4.727581E-04 -7.222524E-04 -1.983474E-04 -1.645322E-01
75 -1.918931E-05 -1.013031E-04 -1.983474E-04 1.608873E-04 -3.525611E-02
76 2.735608E-06 1.641741E-02 -2.692549E-02 2.393906E-02 7.667322E-03
77 1.641741E-02 1.857413E-01 -1.922130E-01 1.708938E-01 5.473471E-02
78 2.692549E-02 1.922130E-01 -1.225324E-01 2.015261E-01 6.454578E-02
79 -2.393906E-02 -1.708938E-01 2.015261E-01 -7.503954E-02 -5.738670E-02
80 -7.667322E-03 -5.473471E-02 6.454578E-02 -5.738670E-02 8.575423E-02
81 6.075128E-02 3.435766E-01 -1.816317E-01 1.614861E-01 5.172157E-02
82 9.185153E-02 4.037655E-01 9.276509E-03 1.977054E-01 6.332208E-02
83 -8.166385E-02 -3.589820E-01 1.977054E-01 5.586898E-02 -5.629874E-02
84 -2.615570E-02 -1.149765E-01 6.332208E-02 -5.629874E-02 2.136143E-01
85 2.373329E-02 2.054217E-01 -1.339883E-01 2.438684E-01 7.810738E-02
86 1.894882E-02 1.797374E-01 -2.366925E-01 8.569855E-02 6.740073E-02
87 2.750305E-03 9.277945E-02 -1.093967E-01 9.726299E-02 -8.800895E-03
88 -3.516396E-02 -1.887695E-01 1.683065E-01 -1.241800E-01 -7.868953E-02
89 -1.126249E-02 -6.046004E-02 5.390604E-02 -7.868953E-02 9.630286E-02
90 1.001331E-02 5.375414E-02 -7.868953E-02 3.536159E-02 -8.562146E-02
91 0.000000E+00 2.092664E-05 -7.890641E-05 1.077923E-05 7.341301E-06
92 2.092664E-05 4.610057E-03 -1.008581E-02 1.377801E-03 9.383645E-04
93 7.890641E-05 1.008581E-02 -2.045704E-02 3.070737E-03 2.091355E-03
94 -1.077923E-05 -1.377801E-03 3.070737E-03 1.601956E-03 -2.856955E-04
95 -7.341301E-06 -9.383645E-04 2.091355E-03 -2.856955E-04 1.826867E-03
96 6.342148E-03 5.892923E-02 -6.893128E-02 9.416552E-03 6.413234E-03
97 2.254008E-02 1.639625E-01 -1.599002E-01 2.694879E-02 1.835374E-02
98 -3.079152E-03 -2.239855E-02 2.694879E-02 3.368960E-02 -2.507264E-03
99 -2.097086E-03 -1.525475E-02 1.835374E-02 -2.507264E-03 3.566342E-02
100 1.262555E-05 9.185550E-03 -2.054046E-02 3.252387E-03 2.215070E-03
101 3.467553E-07 1.085079E-03 -2.793571E-03 -6.477559E-05 2.599085E-04
102 2.215621E-07 1.002488E-03 -2.579309E-03 3.523537E-04 -6.405064E-05
103 -2.960554E-06 -1.953115E-03 4.680271E-03 2.137775E-03 -4.714114E-04
104 -2.016314E-06 -1.330188E-03 3.187544E-03 -4.714114E-04 2.508889E-03
105 2.754443E-07 1.817140E-04 -4.714114E-04 -1.988945E-04 -3.427339E-04
106 0.000000E+00 6.317641E-07 -2.610523E-06 -9.870326E-07 -9.299597E-08
107 6.317641E-07 6.233503E-04 -1.490314E-03 -5.634839E-04 -5.309018E-05
108 2.610523E-06 1.490314E-03 -3.318066E-03 -1.355547E-03 -1.277166E-04
109 9.870326E-07 5.634839E-04 -1.355547E-03 -2.454176E-04 -4.828932E-05
110 9.299597E-08 5.309018E-05 -1.277166E-04 -4.828932E-05 2.625616E-04
111 1.912099E-03 2.301857E-02 -2.899641E-02 -1.096347E-02 -1.032953E-03
112 7.495652E-03 7.084028E-02 -7.707798E-02 -3.452962E-02 -3.253302E-03
113 2.834088E-03 2.678454E-02 -3.452962E-02 1.191073E-03 -1.230066E-03
114 2.670213E-04 2.523578E-03 -3.253302E-03 -1.230066E-03 1.413074E-02
115 0.000000E+00 1.008672E-03 -2.532442E-03 -1.081993E-03 -1.019429E-04
116 0.000000E+00 2.173563E-04 -6.163651E-04 -1.085633E-04 -2.195708E-05
117 0.000000E+00 8.653371E-05 -2.451635E-04 -9.269572E-05 2.994913E-06
118 0.000000E+00 6.046609E-04 -1.607885E-03 -3.635728E-04 -6.111890E-05
119 0.000000E+00 5.696978E-05 -1.514913E-04 -6.111890E-05 2.793672E-04
120 0.000000E+00 2.154013E-05 -6.111890E-05 -1.295173E-05 1.056281E-04
121 0.000000E+00 1.037045E-05 -2.497028E-05 -3.180385E-05 -6.546366E-06
122 1.037045E-05 3.091049E-03 -4.312260E-03 -5.492388E-03 -1.130529E-03
123 2.497028E-05 4.312260E-03 -4.760179E-03 -7.777412E-03 -1.600869E-03
124 3.180385E-05 5.492388E-03 -7.777412E-03 -8.559709E-03 -2.038975E-03
125 6.546366E-06 1.130529E-03 -1.600869E-03 -2.038975E-03 9.264373E-04
126 4.988952E-03 4.883248E-02 -3.633773E-02 -4.628220E-02 -9.526527E-03
127 1.133818E-02 8.693598E-02 -3.566185E-02 -8.465724E-02 -1.742548E-02
128 1.444108E-02 1.107276E-01 -8.465724E-02 -7.701979E-02 -2.219427E-02
129 2.972489E-03 2.279168E-02 -1.742548E-02 -2.219427E-02 2.623705E-02
130 2.007380E-06 2.671636E-03 -3.118692E-03 -5.619842E-03 -1.156764E-03
131 3.229114E-06 3.974861E-03 -6.567554E-03 -6.717220E-03 -1.721791E-03
132 1.788554E-07 7.211484E-04 -1.186682E-03 -1.511439E-03 2.803969E-05
133 4.331542E-06 4.620459E-03 -6.214228E-03 -8.611961E-03 -2.003251E-03
134 8.915858E-07 9.510551E-04 -1.279110E-03 -2.003251E-03 7.079814E-04
135 1.135584E-06 1.211328E-03 -2.003251E-03 -2.257766E-03 9.017332E-04
136 0.000000E+00 0.000000E+00 0.000000E+00 0.000000E+00 0.000000E+00
137 0.000000E+00 5.957406E-07 -2.011543E-06 5.317912E-07 2.497361E-07
138 0.000000E+00 2.011543E-06 -6.539639E-06 1.795615E-06 8.432444E-07
139 0.000000E+00 -5.317912E-07 1.795615E-06 -2.222865E-07 -2.229283E-07
140 0.000000E+00 -2.497361E-07 8.432444E-07 -2.229283E-07 1.477299E-07
141 3.012433E-05 8.748558E-04 -1.479741E-03 3.911990E-04 1.837121E-04
142 1.673500E-04 3.839923E-03 -6.058918E-03 1.737246E-03 8.158332E-04
143 -4.424228E-05 -1.015160E-03 1.737246E-03 5.307817E-05 -2.156817E-04
144 -2.077675E-05 -4.767322E-04 8.158332E-04 -2.156817E-04 4.110666E-04
145 0.000000E+00 4.933330E-07 -1.864300E-06 5.241605E-07 2.461526E-07
146 0.000000E+00 5.461509E-08 -2.194952E-07 2.673197E-08 2.725066E-08
147 0.000000E+00 2.891876E-08 -1.162230E-07 3.072584E-08 -2.677208E-10
148 0.000000E+00 -2.159853E-07 8.409304E-07 -1.269623E-07 -1.077677E-07
149 0.000000E+00 -1.014295E-07 3.949118E-07 -1.077677E-07 5.191044E-08
150 0.000000E+00 2.681490E-08 -1.077677E-07 1.576256E-08 -1.372355E-08
151 0.000000E+00 0.000000E+00 0.000000E+00 0.000000E+00 0.000000E+00
152 0.000000E+00 0.000000E+00 0.000000E+00 0.000000E+00 0.000000E+00
153 0.000000E+00 0.000000E+00 0.000000E+00 0.000000E+00 0.000000E+00
154 0.000000E+00 0.000000E+00 0.000000E+00 0.000000E+00 0.000000E+00
155 0.000000E+00 0.000000E+00 0.000000E+00 0.000000E+00 0.000000E+00
156 6.810364E-07 4.377781E-05 -8.896889E-05 -5.738171E-06 1.240477E-05
157 4.660077E-06 2.375270E-04 -4.607900E-04 -3.133010E-05 6.772935E-05
158 3.005581E-07 1.531963E-05 -3.133010E-05 2.295456E-05 4.368298E-06
159 -6.497459E-07 -3.311795E-05 6.772935E-05 4.368298E-06 1.553186E-05
160 0.000000E+00 0.000000E+00 0.000000E+00 0.000000E+00 0.000000E+00
161 0.000000E+00 0.000000E+00 0.000000E+00 0.000000E+00 0.000000E+00
162 0.000000E+00 0.000000E+00 0.000000E+00 0.000000E+00 0.000000E+00
163 0.000000E+00 0.000000E+00 0.000000E+00 0.000000E+00 0.000000E+00
164 0.000000E+00 0.000000E+00 0.000000E+00 0.000000E+00 0.000000E+00
165 0.000000E+00 0.000000E+00 0.000000E+00 0.000000E+00 0.000000E+00
166 0.000000E+00 0.000000E+00 0.000000E+00 0.000000E+00 0.000000E+00
167 0.000000E+00 0.000000E+00 0.000000E+00 0.000000E+00 0.000000E+00
168 0.000000E+00 0.000000E+00 0.000000E+00 0.000000E+00 0.000000E+00
169 0.000000E+00 0.000000E+00 0.000000E+00 0.000000E+00 0.000000E+00
170 0.000000E+00 0.000000E+00 0.000000E+00 0.000000E+00 0.000000E+00
171 2.426791E-08 1.277069E-05 -3.067274E-05 -1.056701E-05 -8.374408E-07
172 1.738612E-07 6.632026E-05 -1.517883E-04 -5.501031E-05 -4.359593E-06
173 5.989660E-08 2.284788E-05 -5.501031E-05 -1.106205E-05 -1.501916E-06
174 4.746834E-09 1.810705E-06 -4.359593E-06 -1.501916E-06 7.770428E-06
175 0.000000E+00 0.000000E+00 0.000000E+00 0.000000E+00 0.000000E+00
176 0.000000E+00 0.000000E+00 0.000000E+00 0.000000E+00 0.000000E+00
177 0.000000E+00 0.000000E+00 0.000000E+00 0.000000E+00 0.000000E+00
178 0.000000E+00 0.000000E+00 0.000000E+00 0.000000E+00 0.000000E+00
179 0.000000E+00 0.000000E+00 0.000000E+00 0.000000E+00 0.000000E+00
180 0.000000E+00 0.000000E+00 0.000000E+00 0.000000E+00 0.000000E+00
181 0.000000E+00 0.000000E+00 0.000000E+00 0.000000E+00 0.000000E+00
182 0.000000E+00 0.000000E+00 0.000000E+00 0.000000E+00 0.000000E+00
183 0.000000E+00 0.000000E+00 0.000000E+00 0.000000E+00 0.000000E+00
184 0.000000E+00 0.000000E+00 0.000000E+00 0.000000E+00 0.000000E+00
185 0.000000E+00 0.000000E+00 0.000000E+00 0.000000E+00 0.000000E+00
186 8.770468E-07 5.349976E-05 -9.888068E-05 4.188074E-05 -1.882548E-05
187 5.451200E-06 2.636207E-04 -4.598770E-04 2.077242E-04 -9.337243E-05
188 -2.308847E-06 -1.116561E-04 2.077242E-04 -5.742018E-05 3.954773E-05
189 1.037831E-06 5.018964E-05 -9.337243E-05 3.954773E-05 1.278426E-05
190 0.000000E+00 0.000000E+00 0.000000E+00 0.000000E+00 0.000000E+00
191 0.000000E+00 0.000000E+00 0.000000E+00 0.000000E+00 0.000000E+00
192 0.000000E+00 0.000000E+00 0.000000E+00 0.000000E+00 0.000000E+00
193 0.000000E+00 0.000000E+00 0.000000E+00 0.000000E+00 0.000000E+00
194 0.000000E+00 0.000000E+00 0.000000E+00 0.000000E+00 0.000000E+00
195 0.000000E+00 0.000000E+00 0.000000E+00 0.000000E+00 0.000000E+00
196 0.000000E+00 0.000000E+00 0.000000E+00 0.000000E+00 0.000000E+00
197 0.000000E+00 0.000000E+00 0.000000E+00 0.000000E+00 0.000000E+00
198 0.000000E+00 0.000000E+00 0.000000E+00 0.000000E+00 0.000000E+00
199 0.000000E+00 0.000000E+00 0.000000E+00 0.000000E+00 0.000000E+00
200 0.000000E+00 0.000000E+00 0.000000E+00 0.000000E+00 0.000000E+00
201 0.000000E+00 0.000000E+00 0.000000E+00 0.000000E+00 0.000000E+00
202 0.000000E+00 0.000000E+00 0.000000E+00 0.000000E+00 0.000000E+00
203 0.000000E+00 0.000000E+00 0.000000E+00 0.000000E+00 0.000000E+00
204 0.000000E+00 0.000000E+00 0.000000E+00 0.000000E+00 0.000000E+00
205 0.000000E+00 0.000000E+00 0.000000E+00 0.000000E+00 0.000000E+00
206 0.000000E+00 0.000000E+00 0.000000E+00 0.000000E+00 0.000000E+00
207 0.000000E+00 0.000000E+00 0.000000E+00 0.000000E+00 0.000000E+00
208 0.000000E+00 0.000000E+00 0.000000E+00 0.000000E+00 0.000000E+00
209 0.000000E+00 0.000000E+00 0.000000E+00 0.000000E+00 0.000000E+00
210 0.000000E+00 0.000000E+00 0.000000E+00 0.000000E+00 0.000000E+00
211 0.000000E+00 0.000000E+00 0.000000E+00 0.000000E+00 0.000000E+00
212 0.000000E+00 0.000000E+00 0.000000E+00 0.000000E+00 0.000000E+00
213 0.000000E+00 0.000000E+00 0.000000E+00 0.000000E+00 0.000000E+00
214 0.000000E+00 0.000000E+00 0.000000E+00 0.000000E+00 0.000000E+00
215 0.000000E+00 0.000000E+00 0.000000E+00 0.000000E+00 0.000000E+00
216 0.000000E+00 0.000000E+00 0.000000E+00 0.000000E+00 0.000000E+00
217 0.000000E+00 0.000000E+00 0.000000E+00 0.000000E+00 0.000000E+00
218 0.000000E+00 0.000000E+00 0.000000E+00 0.000000E+00 0.000000E+00
219 0.000000E+00 0.000000E+00 0.000000E+00 0.000000E+00 0.000000E+00
220 0.000000E+00 0.000000E+00 0.000000E+00 0.000000E+00 0.000000E+00
221 0.000000E+00 0.000000E+00 0.000000E+00 0.000000E+00 0.000000E+00
222 0.000000E+00 0.000000E+00 0.000000E+00 0.000000E+00 0.000000E+00
223 0.000000E+00 0.000000E+00 0.000000E+00 0.000000E+00 0.000000E+00
224 0.000000E+00 0.000000E+00 0.000000E+00 0.000000E+00 0.000000E+00
225 0.000000E+00 0.000000E+00 0.000000E+00 0.000000E+00 0.000000E+00
226 0.000000E+00 0.000000E+00 0.000000E+00 0.000000E+00 0.000000E+00
227 0.000000E+00 0.000000E+00 0.000000E+00 0.000000E+00 0.000000E+00
228 0.000000E+00 0.000000E+00 0.000000E+00 0.000000E+00 0.000000E+00
229 0.000000E+00 0.000000E+00 0.000000E+00 0.000000E+00 0.000000E+00
230 0.000000E+00 0.000000E+00 0.000000E+00 0.000000E+00 0.000000E+00
231 0.000000E+00 4.519042E-08 -1.172317E-07 -1.631693E-09 4.018727E-09
232 0.000000E+00 3.234703E-07 -8.141326E-07 -1.167956E-08 2.876581E-08
233 0.000000E+00 4.502234E-09 -1.167956E-08 2.484189E-08 4.003780E-10
234 0.000000E+00 -1.108863E-08 2.876581E-08 4.003780E-10 2.401835E-08
235 0.000000E+00 0.000000E+00 0.000000E+00 0.000000E+00 0.000000E+00
236 0.000000E+00 0.000000E+00 0.000000E+00 0.000000E+00 0.000000E+00
237 0.000000E+00 0.000000E+00 0.000000E+00 0.000000E+00 0.000000E+00
238 0.000000E+00 0.000000E+00 0.000000E+00 0.000000E+00 0.000000E+00
239 0.000000E+00 0.000000E+00 0.000000E+00 0.000000E+00 0.000000E+00
240 0.000000E+00 0.000000E+00 0.000000E+00 0.000000E+00 0.000000E+00
241 0.000000E+00 0.000000E+00 0.000000E+00 0.000000E+00 0.000000E+00
242 0.000000E+00 0.000000E+00 0.000000E+00 0.000000E+00 0.000000E+00
243 0.000000E+00 0.000000E+00 0.000000E+00 0.000000E+00 0.000000E+00
244 0.000000E+00 0.000000E+00 0.000000E+00 0.000000E+00 0.000000E+00
245 0.000000E+00 0.000000E+00 0.000000E+00 0.000000E+00 0.000000E+00
246 0.000000E+00 0.000000E+00 0.000000E+00 0.000000E+00 0.000000E+00
247 0.000000E+00 0.000000E+00 0.000000E+00 0.000000E+00 0.000000E+00
248 0.000000E+00 0.000000E+00 0.000000E+00 0.000000E+00 0.000000E+00
249 0.000000E+00 0.000000E+00 0.000000E+00 0.000000E+00 0.000000E+00
250 0.000000E+00 0.000000E+00 0.000000E+00 0.000000E+00 0.000000E+00
251 0.000000E+00 0.000000E+00 0.000000E+00 0.000000E+00 0.000000E+00
252 0.000000E+00 0.000000E+00 0.000000E+00 0.000000E+00 0.000000E+00
253 0.000000E+00 0.000000E+00 0.000000E+00 0.000000E+00 0.000000E+00
254 0.000000E+00 0.000000E+00 0.000000E+00 0.000000E+00 0.000000E+00
255 0.000000E+00 0.000000E+00 0.000000E+00 0.000000E+00 0.000000E+00
256 0.000000E+00 0.000000E+00 0.000000E+00 0.000000E+00 0.000000E+00
257 0.000000E+00 0.000000E+00 0.000000E+00 0.000000E+00 0.000000E+00
258 0.000000E+00 0.000000E+00 0.000000E+00 0.000000E+00 0.000000E+00
259 0.000000E+00 0.000000E+00 0.000000E+00 0.000000E+00 0.000000E+00
260 0.000000E+00 0.000000E+00 0.000000E+00 0.000000E+00 0.000000E+00
261 0.000000E+00 0.000000E+00 0.000000E+00 0.000000E+00 0.000000E+00
262 0.000000E+00 0.000000E+00 0.000000E+00 0.000000E+00 0.000000E+00
263 0.000000E+00 0.000000E+00 0.000000E+00 0.000000E+00 0.000000E+00
264 0.000000E+00 0.000000E+00 0.000000E+00 0.000000E+00 0.000000E+00
265 0.000000E+00 0.000000E+00 0.000000E+00 0.000000E+00 0.000000E+00
266 0.000000E+00 0.000000E+00 0.000000E+00 0.000000E+00 0.000000E+00
267 0.000000E+00 0.000000E+00 0.000000E+00 0.000000E+00 0.000000E+00
268 0.000000E+00 0.000000E+00 0.000000E+00 0.000000E+00 0.000000E+00
269 0.000000E+00 0.000000E+00 0.000000E+00 0.000000E+00 0.000000E+00
270 0.000000E+00 0.000000E+00 0.000000E+00 0.000000E+00 0.000000E+00
271 0.000000E+00 0.000000E+00 0.000000E+00 0.000000E+00 0.000000E+00
272 0.000000E+00 0.000000E+00 0.000000E+00 0.000000E+00 0.000000E+00
273 0.000000E+00 0.000000E+00 0.000000E+00 0.000000E+00 0.000000E+00
274 0.000000E+00 0.000000E+00 0.000000E+00 0.000000E+00 0.000000E+00
275 0.000000E+00 0.000000E+00 0.000000E+00 0.000000E+00 0.000000E+00
276 0.000000E+00 0.000000E+00 0.000000E+00 0.000000E+00 0.000000E+00
277 0.000000E+00 0.000000E+00 0.000000E+00 0.000000E+00 0.000000E+00
278 0.000000E+00 0.000000E+00 0.000000E+00 0.000000E+00 0.000000E+00
279 0.000000E+00 0.000000E+00 0.000000E+00 0.000000E+00 0.000000E+00
280 0.000000E+00 0.000000E+00 0.000000E+00 0.000000E+00 0.000000E+00
281 0.000000E+00 0.000000E+00 0.000000E+00 0.000000E+00 0.000000E+00
282 0.000000E+00 0.000000E+00 0.000000E+00 0.000000E+00 0.000000E+00
283 0.000000E+00 0.000000E+00 0.000000E+00 0.000000E+00 0.000000E+00
284 0.000000E+00 0.000000E+00 0.000000E+00 0.000000E+00 0.000000E+00
285 0.000000E+00 0.000000E+00 0.000000E+00 0.000000E+00 0.000000E+00
286 0.000000E+00 0.000000E+00 0.000000E+00 0.000000E+00 0.000000E+00
287 0.000000E+00 0.000000E+00 0.000000E+00 0.000000E+00 0.000000E+00
288 0.000000E+00 0.000000E+00 0.000000E+00 0.000000E+00 0.000000E+00
289 0.000000E+00 0.000000E+00 0.000000E+00 0.000000E+00 0.000000E+00
290 0.000000E+00 0.000000E+00 0.000000E+00 0.000000E+00 0.000000E+00
291 0.000000E+00 0.000000E+00 0.000000E+00 0.000000E+00 0.000000E+00
292 0.000000E+00 0.000000E+00 0.000000E+00 0.000000E+00 0.000000E+00
293 0.000000E+00 0.000000E+00 0.000000E+00 0.000000E+00 0.000000E+00
294 0.000000E+00 0.000000E+00 0.000000E+00 0.000000E+00 0.000000E+00
295 0.000000E+00 0.000000E+00 0.000000E+00 0.000000E+00 0.000000E+00
296 0.000000E+00 0.000000E+00 0.000000E+00 0.000000E+00 0.000000E+00
297 0.000000E+00 0.000000E+00 0.000000E+00 0.000000E+00 0.000000E+00
298 0.000000E+00 0.000000E+00 0.000000E+00 0.000000E+00 0.000000E+00
299 0.000000E+00 0.000000E+00 0.000000E+00 0.000000E+00 0.000000E+00
300 0.000000E+00 0.000000E+00 0.000000E+00 0.000000E+00 0.000000E+00
301 0.000000E+00 0.000000E+00 0.000000E+00 0.000000E+00 0.000000E+00
302 0.000000E+00 0.000000E+00 0.000000E+00 0.000000E+00 0.000000E+00
303 0.000000E+00 0.000000E+00 0.000000E+00 0.000000E+00 0.000000E+00
304 0.000000E+00 0.000000E+00 0.000000E+00 0.000000E+00 0.000000E+00
305 0.000000E+00 0.000000E+00 0.000000E+00 0.000000E+00 0.000000E+00
306 0.000000E+00 0.000000E+00 0.000000E+00 0.000000E+00 0.000000E+00
307 0.000000E+00 0.000000E+00 0.000000E+00 0.000000E+00 0.000000E+00
308 0.000000E+00 0.000000E+00 0.000000E+00 0.000000E+00 0.000000E+00
309 0.000000E+00 0.000000E+00 0.000000E+00 0.000000E+00 0.000000E+00
310 0.000000E+00 0.000000E+00 0.000000E+00 0.000000E+00 0.000000E+00
311 0.000000E+00 0.000000E+00 0.000000E+00 0.000000E+00 0.000000E+00
312 0.000000E+00 0.000000E+00 0.000000E+00 0.000000E+00 0.000000E+00
313 0.000000E+00 0.000000E+00 0.000000E+00 0.000000E+00 0.000000E+00
314 0.000000E+00 0.000000E+00 0.000000E+00 0.000000E+00 0.000000E+00
315 0.000000E+00 0.000000E+00 0.000000E+00 0.000000E+00 0.000000E+00
316 2.845692E-07 5.243710E-04 9.798509E-04 -3.482106E-04 -9.074028E-04
317 3.409927E-03 3.545186E-02 3.156039E-02 -1.121565E-02 -2.922688E-02
318 0.000000E+00 -2.477734E-04 -5.089324E-04 2.025648E-04 5.278642E-04
319 0.000000E+00 8.805147E-05 2.025648E-04 -1.090857E-05 -1.875876E-04
320 0.000000E+00 2.294535E-04 5.278642E-04 -1.875876E-04 -4.277579E-04
321 0.000000E+00 4.021728E-05 1.119629E-04 -4.690266E-05 -1.326142E-05
322 8.774036E-04 1.209308E-02 1.572902E-02 -6.589079E-03 -1.863019E-03
323 0.000000E+00 -1.546675E-05 -5.069924E-05 2.230551E-05 6.306737E-06
324 0.000000E+00 6.479214E-06 2.230551E-05 -6.797040E-06 -2.641970E-06
325 0.000000E+00 1.831955E-06 6.306737E-06 -2.641970E-06 1.800012E-06
326 3.154172E-05 6.676510E-03 -5.493773E-03 1.299893E-02 3.633281E-03
327 1.306931E-02 1.024702E-01 -4.054890E-02 9.594357E-02 2.681682E-02
328 8.410294E-07 2.475732E-03 -1.050171E-03 5.840343E-03 1.632412E-03
329 -1.989977E-06 -5.857880E-03 5.840343E-03 -1.240081E-02 -3.862483E-03
330 -5.562109E-07 -1.637314E-03 1.632412E-03 -3.862483E-03 3.385612E-04
331 0.000000E+00 2.656584E-06 -4.422283E-06 -7.750955E-06 -1.692742E-06
332 2.086896E-04 3.865215E-03 -2.948056E-03 -5.167070E-03 -1.128443E-03
333 0.000000E+00 3.207420E-07 -5.726421E-07 -1.158345E-06 -2.529725E-07
334 0.000000E+00 5.621660E-07 -1.158345E-06 -1.941988E-06 -4.433859E-07
335 0.000000E+00 1.227722E-07 -2.529725E-07 -4.433859E-07 -8.583805E-09
336 0.000000E+00 0.000000E+00 0.000000E+00 0.000000E+00 0.000000E+00
337 6.529939E-06 2.446310E-04 -3.962820E-04 1.732380E-04 1.440195E-04
338 0.000000E+00 0.000000E+00 0.000000E+00 0.000000E+00 0.000000E+00
339 0.000000E+00 0.000000E+00 0.000000E+00 0.000000E+00 0.000000E+00
340 0.000000E+00 0.000000E+00 0.000000E+00 0.000000E+00 0.000000E+00
341 0.000000E+00 0.000000E+00 0.000000E+00 0.000000E+00 0.000000E+00
342 2.626590E-07 1.883925E-05 -3.676461E-05 -4.722291E-06 1.369751E-05
343 0.000000E+00 0.000000E+00 0.000000E+00 0.000000E+00 0.000000E+00
344 0.000000E+00 0.000000E+00 0.000000E+00 0.000000E+00 0.000000E+00
345 0.000000E+00 0.000000E+00 0.000000E+00 0.000000E+00 0.000000E+00
346 0.000000E+00 0.000000E+00 0.000000E+00 0.000000E+00 0.000000E+00
347 2.325119E-06 1.072496E-04 -1.628697E-04 1.223165E-04 -4.342895E-05
348 0.000000E+00 0.000000E+00 0.000000E+00 0.000000E+00 0.000000E+00
349 0.000000E+00 0.000000E+00 0.000000E+00 0.000000E+00 0.000000E+00
350 0.000000E+00 0.000000E+00 0.000000E+00 0.000000E+00 0.000000E+00
351 0.000000E+00 0.000000E+00 0.000000E+00 0.000000E+00 0.000000E+00
352 1.531207E-06 7.716260E-05 -1.363230E-04 3.757944E-05 -5.625353E-05
353 0.000000E+00 0.000000E+00 0.000000E+00 0.000000E+00 0.000000E+00
354 0.000000E+00 0.000000E+00 0.000000E+00 0.000000E+00 0.000000E+00
355 0.000000E+00 0.000000E+00 0.000000E+00 0.000000E+00 0.000000E+00
356 0.000000E+00 0.000000E+00 0.000000E+00 0.000000E+00 0.000000E+00
357 0.000000E+00 0.000000E+00 0.000000E+00 0.000000E+00 0.000000E+00
358 0.000000E+00 0.000000E+00 0.000000E+00 0.000000E+00 0.000000E+00
359 0.000000E+00 0.000000E+00 0.000000E+00 0.000000E+00 0.000000E+00
360 0.000000E+00 0.000000E+00 0.000000E+00 0.000000E+00 0.000000E+00
361 0.000000E+00 0.000000E+00 0.000000E+00 0.000000E+00 0.000000E+00
362 0.000000E+00 0.000000E+00 0.000000E+00 0.000000E+00 0.000000E+00
363 0.000000E+00 0.000000E+00 0.000000E+00 0.000000E+00 0.000000E+00
364 0.000000E+00 0.000000E+00 0.000000E+00 0.000000E+00 0.000000E+00
365 0.000000E+00 0.000000E+00 0.000000E+00 0.000000E+00 0.000000E+00
366 0.000000E+00 0.000000E+00 0.000000E+00 0.000000E+00 0.000000E+00
367 0.000000E+00 0.000000E+00 0.000000E+00 0.000000E+00 0.000000E+00
368 0.000000E+00 0.000000E+00 0.000000E+00 0.000000E+00 0.000000E+00
369 0.000000E+00 0.000000E+00 0.000000E+00 0.000000E+00 0.000000E+00
370 0.000000E+00 0.000000E+00 0.000000E+00 0.000000E+00 0.000000E+00
371 0.000000E+00 0.000000E+00 0.000000E+00 0.000000E+00 0.000000E+00
372 0.000000E+00 0.000000E+00 0.000000E+00 0.000000E+00 0.000000E+00
373 0.000000E+00 0.000000E+00 0.000000E+00 0.000000E+00 0.000000E+00
374 0.000000E+00 0.000000E+00 0.000000E+00 0.000000E+00 0.000000E+00
375 0.000000E+00 0.000000E+00 0.000000E+00 0.000000E+00 0.000000E+00
6 7 8 9 10
6 1.000000E+00
7 0.000000E+00 1.000000E+00
8 0.000000E+00 0.000000E+00 1.000000E+00
9 0.000000E+00 0.000000E+00 0.000000E+00 1.000000E+00
10 6.299363E-01 0.000000E+00 0.000000E+00 0.000000E+00 1.000000E+00
11 6.299363E-01 0.000000E+00 0.000000E+00 0.000000E+00 3.333333E-01
12 6.299363E-01 0.000000E+00 0.000000E+00 0.000000E+00 3.333333E-01
13 0.000000E+00 0.000000E+00 0.000000E+00 0.000000E+00 0.000000E+00
14 0.000000E+00 0.000000E+00 0.000000E+00 0.000000E+00 0.000000E+00
15 0.000000E+00 0.000000E+00 0.000000E+00 0.000000E+00 0.000000E+00
16 5.399566E-02 -2.029422E-02 -1.124342E-01 -2.728486E-02 1.424601E-03
17 3.134878E-01 -9.162344E-02 -5.076128E-01 -1.231845E-01 7.174189E-02
18 4.104327E-02 1.980726E-01 -6.918102E-02 -1.678844E-02 -6.425496E-03
19 2.273882E-01 -6.918102E-02 -1.727175E-01 -9.301143E-02 1.144612E-01
20 5.518122E-02 -1.678844E-02 -9.301143E-02 1.879882E-01 2.777677E-02
21 5.291652E-01 -1.031473E-01 -5.714576E-01 -1.386779E-01 2.230847E-01
22 1.031473E-01 5.090593E-01 -1.113912E-01 -2.703175E-02 4.192448E-02
23 5.714576E-01 -1.113912E-01 -8.796485E-02 -1.497615E-01 3.979117E-01
24 1.386779E-01 -2.703175E-02 -1.497615E-01 4.928220E-01 9.656285E-02
25 2.230847E-01 -4.192448E-02 -3.979117E-01 -9.656285E-02 4.355903E-02
26 3.096108E-01 -9.967976E-02 -3.866050E-01 -1.340159E-01 1.256247E-01
27 2.254380E-01 -7.258017E-02 -4.021092E-01 -5.738459E-02 2.550334E-02
28 2.796188E-02 1.344473E-01 -2.398256E-02 -1.210338E-02 -2.310494E-02
29 6.785622E-03 3.262687E-02 -1.210338E-02 2.295530E-02 -5.606970E-03
30 3.759375E-02 -1.210338E-02 -3.224370E-02 1.271771E-01 4.471680E-02
31 4.694687E-03 6.579777E-03 -1.481335E-02 -4.118003E-03 1.121532E-06
32 3.685716E-02 4.488765E-02 -1.010576E-01 -2.809328E-02 3.965197E-04
33 -1.369861E-02 2.189517E-03 3.819329E-02 1.061745E-02 -1.710630E-04
34 3.084032E-02 3.819329E-02 -6.683216E-02 -2.390356E-02 8.970424E-04
35 8.573380E-03 1.061745E-02 -2.390356E-02 1.250915E-02 2.493711E-04
36 1.255983E-01 1.105637E-01 -2.489171E-01 -6.919710E-02 1.894969E-02
37 -8.739811E-02 4.526871E-02 1.732100E-01 4.815111E-02 -1.339047E-02
38 1.967634E-01 1.732100E-01 -2.677508E-01 -1.084048E-01 5.771676E-02
39 5.469876E-02 4.815111E-02 -1.084048E-01 9.206918E-02 1.604483E-02
40 4.846200E-02 3.675119E-02 -1.288787E-01 -3.582733E-02 5.321989E-04
41 7.827808E-02 9.246507E-02 -1.620318E-01 -5.786996E-02 6.010683E-03
42 4.400411E-02 5.197935E-02 -1.170235E-01 -1.970535E-02 8.817384E-04
43 -2.857675E-02 6.201654E-03 5.824801E-02 2.112642E-02 -1.779438E-03
44 -7.944124E-03 1.724014E-03 2.112642E-02 -1.187533E-02 -4.946707E-04
45 1.788497E-02 2.112642E-02 -3.645495E-02 2.673548E-02 2.676405E-03
46 1.243010E-02 3.392417E-02 -1.714139E-02 -1.266196E-02 1.134554E-04
47 9.974983E-02 2.127374E-01 -1.074931E-01 -7.940277E-02 2.206022E-02
48 -9.101836E-02 -1.360500E-01 1.012203E-01 7.476919E-02 -3.490240E-02
49 4.599026E-02 1.012203E-01 1.312785E-02 -3.777979E-02 2.251735E-02
50 3.397198E-02 7.476919E-02 -3.777979E-02 3.636593E-02 1.663306E-02
51 2.469947E-01 3.497744E-01 -1.767359E-01 -1.305509E-01 1.062402E-01
52 -3.497744E-01 -2.483281E-01 2.502795E-01 1.848759E-01 -1.867861E-01
53 1.767359E-01 2.502795E-01 1.205321E-01 -9.341509E-02 1.255598E-01
54 1.305509E-01 1.848759E-01 -9.341509E-02 1.779911E-01 9.274819E-02
55 1.062402E-01 1.867861E-01 -1.255598E-01 -9.274819E-02 3.271604E-02
56 7.370338E-02 1.723900E-01 -5.592668E-02 -6.434337E-02 1.583950E-02
57 6.863498E-02 1.605351E-01 -8.111606E-02 -3.688705E-02 1.074227E-02
58 -3.823840E-02 -6.243623E-02 -8.247565E-03 3.338228E-02 -3.113726E-02
59 -2.824585E-02 -4.612025E-02 3.338228E-02 -2.878076E-02 -2.300040E-02
60 1.427222E-02 3.338228E-02 3.078347E-03 1.454250E-02 1.435339E-02
61 3.902432E-02 7.997143E-02 1.713635E-02 -9.885741E-05 2.467499E-02
62 2.316951E-01 4.117135E-01 8.822237E-02 -5.089434E-04 2.179791E-01
63 -1.303194E-01 -1.117742E-01 -5.066131E-02 2.922586E-04 -2.638355E-01
64 -2.792496E-02 -5.066131E-02 1.137948E-01 6.262544E-05 -8.027108E-02
65 1.610955E-04 2.922586E-04 6.262544E-05 1.246502E-01 4.630735E-04
66 4.748944E-01 6.111213E-01 1.309516E-01 -7.554431E-04 3.351388E-01
67 -4.830777E-01 -1.595880E-01 -1.332082E-01 7.684607E-04 -4.251781E-01
68 -1.035143E-01 -1.332082E-01 4.335200E-01 1.646665E-04 -1.420259E-01
69 5.971609E-04 7.684607E-04 1.646665E-04 4.620630E-01 8.193289E-04
70 3.383642E-01 4.057960E-01 1.252008E-01 -7.222671E-04 4.322257E-01
71 2.493460E-01 4.305678E-01 5.401604E-02 -5.322503E-04 1.696925E-01
72 2.450621E-01 4.231703E-01 9.067733E-02 -3.024671E-04 1.370736E-01
73 3.462871E-02 2.667409E-02 -1.417613E-01 -7.391794E-05 1.783795E-01
74 -1.997686E-04 -1.538794E-04 -7.391794E-05 -1.545741E-01 -1.029048E-03
75 -4.280660E-05 -7.391794E-05 1.752395E-04 -3.312228E-02 -3.259389E-04
76 6.075128E-02 -9.185153E-02 8.166385E-02 2.615570E-02 2.373329E-02
77 3.435766E-01 -4.037655E-01 3.589820E-01 1.149765E-01 2.054217E-01
78 1.816317E-01 9.276509E-03 1.977054E-01 6.332208E-02 1.339883E-01
79 -1.614861E-01 1.977054E-01 5.586898E-02 -5.629874E-02 -2.438684E-01
80 -5.172157E-02 6.332208E-02 -5.629874E-02 2.136143E-01 -7.810738E-02
81 5.625260E-01 -4.410720E-01 3.921507E-01 1.256000E-01 2.957240E-01
82 4.410720E-01 2.166850E-01 3.074821E-01 9.848191E-02 2.499368E-01
83 -3.921507E-01 3.074821E-01 2.891481E-01 -8.755883E-02 -3.405031E-01
84 -1.256000E-01 9.848191E-02 -8.755883E-02 5.344822E-01 -1.090580E-01
85 2.957240E-01 -2.499368E-01 3.405031E-01 1.090580E-01 1.234683E-01
86 2.847951E-01 -3.688278E-01 2.096314E-01 1.050277E-01 2.818184E-01
87 2.477939E-01 -3.209089E-01 2.853154E-01 5.349637E-02 1.054465E-01
88 -8.032269E-02 1.582587E-03 2.273468E-02 -2.962166E-02 -1.872900E-01
89 -2.572615E-02 5.068788E-04 -2.962166E-02 1.057326E-01 -5.998618E-02
90 2.287275E-02 -2.962166E-02 -6.473942E-03 -9.400533E-02 1.090265E-01
91 6.342148E-03 -2.254008E-02 3.079152E-03 2.097086E-03 1.262555E-05
92 5.892923E-02 -1.639625E-01 2.239855E-02 1.525475E-02 9.185550E-03
93 6.893128E-02 -1.599002E-01 2.694879E-02 1.835374E-02 2.054046E-02
94 -9.416552E-03 2.694879E-02 3.368960E-02 -2.507264E-03 -3.252387E-03
95 -6.413234E-03 1.835374E-02 -2.507264E-03 3.566342E-02 -2.215070E-03
96 1.741946E-01 -3.213039E-01 4.389263E-02 2.989350E-02 7.677183E-02
97 3.213039E-01 -4.184543E-01 8.096047E-02 5.513891E-02 1.887405E-01
98 -4.389263E-02 8.096047E-02 1.631347E-01 -7.532407E-03 -3.195090E-02
99 -2.989350E-02 5.513891E-02 -7.532407E-03 1.690645E-01 -2.176047E-02
100 7.677183E-02 -1.887405E-01 3.195090E-02 2.176047E-02 1.939360E-02
101 3.591151E-02 -1.094055E-01 8.778180E-03 1.017888E-02 1.871456E-03
102 3.549490E-02 -1.081363E-01 1.477227E-02 5.860380E-03 1.639275E-03
103 -9.851883E-03 2.467288E-02 3.499854E-02 -2.792451E-03 -4.849636E-03
104 -6.709720E-03 1.680370E-02 -2.792451E-03 3.719687E-02 -3.302891E-03
105 9.166003E-04 -2.792451E-03 -3.256197E-03 -5.081383E-03 5.108343E-04
106 1.912099E-03 -7.495652E-03 -2.834088E-03 -2.670213E-04 0.000000E+00
107 2.301857E-02 -7.084028E-02 -2.678454E-02 -2.523578E-03 1.008672E-03
108 2.899641E-02 -7.707798E-02 -3.452962E-02 -3.253302E-03 2.532442E-03
109 1.096347E-02 -3.452962E-02 1.191073E-03 -1.230066E-03 1.081993E-03
110 1.032953E-03 -3.253302E-03 -1.230066E-03 1.413074E-02 1.019429E-04
111 9.348195E-02 -1.902653E-01 -7.193886E-02 -6.777916E-03 3.070358E-02
112 1.902653E-01 -2.937682E-01 -1.464183E-01 -1.379520E-02 8.539491E-02
113 7.193886E-02 -1.464183E-01 3.812154E-02 -5.215933E-03 3.902555E-02
114 6.777916E-03 -1.379520E-02 -5.215933E-03 9.299052E-02 3.676899E-03
115 3.070358E-02 -8.539491E-02 -3.902555E-02 -3.676899E-03 1.534083E-03
116 1.516084E-02 -5.096586E-02 -1.253213E-02 -1.815582E-03 3.449937E-04
117 1.259127E-02 -4.232779E-02 -1.600404E-02 -8.730302E-04 9.285353E-05
118 1.187654E-02 -3.408987E-02 3.375510E-04 -1.422271E-03 1.052480E-03
119 1.118980E-03 -3.211870E-03 -1.422271E-03 1.529913E-02 9.916223E-05
120 4.230838E-04 -1.422271E-03 1.202474E-05 5.784564E-03 4.151527E-05
121 4.988952E-03 -1.133818E-02 -1.444108E-02 -2.972489E-03 2.007380E-06
122 4.883248E-02 -8.693598E-02 -1.107276E-01 -2.279168E-02 2.671636E-03
123 3.633773E-02 -3.566185E-02 -8.465724E-02 -1.742548E-02 3.118692E-03
124 4.628220E-02 -8.465724E-02 -7.701979E-02 -2.219427E-02 5.619842E-03
125 9.526527E-03 -1.742548E-02 -2.219427E-02 2.623705E-02 1.156764E-03
126 1.537939E-01 -1.814136E-01 -2.310607E-01 -4.756053E-02 4.246354E-02
127 1.814136E-01 -6.019951E-02 -2.725566E-01 -5.610187E-02 5.922801E-02
128 2.310607E-01 -2.725566E-01 -1.933527E-01 -7.145515E-02 1.053725E-01
129 4.756053E-02 -5.610187E-02 -7.145515E-02 1.390859E-01 2.168942E-02
130 4.246354E-02 -5.922801E-02 -1.053725E-01 -2.168942E-02 1.550464E-03
131 5.108905E-02 -9.953656E-02 -9.684085E-02 -2.609513E-02 4.135682E-03
132 2.955407E-02 -5.758005E-02 -7.333787E-02 -8.933718E-03 5.136318E-04
133 3.058091E-02 -3.365559E-02 -5.553132E-02 -1.562004E-02 3.789569E-03
[truncated: 42,910 more rows]

## Sheet: HOMO LUMO
Alpha HOMO energy: -0.19849					-5.40119	eV
Alpha LUMO energy: -0.01648					-0.448444	eV
	S.No	Chemical Parameter	Value (eV)
	1	HOMO	-5.4
	2	LUMO	-0.45
	3	Energy gap (ΔE)	4.95
	4	Ionization potential (I)	5.4
	5	Electron affinity (A)	0.45
	6	Electronegativity (χ)	2.93
	7	Chemical hardness (η)	4.95
	8	Chemical potential (μ)	-2.93
	9	Electrophilicity index(ω)	1.46
	10	Chemical softness (σ)	0.2

## Sheet: Bond length_Bond Angle
Bond length					Bond angle
Bond Length (Å)	B3LYB /6-311g(d,p)				Bond Angle (◦)	B3LYB /6-311g(d,p)
C1 -C2	1.45353				C1 -C2 -O3 -C4	-13.2852
C1 -C6	1.38196				C1 -C2 -C9 -C8	0.068961
C2 -C9	1.38174				C1 -C2 -C9 -H25	-179.906
C4 -O5	1.46789				C1 -O5 -C4 -O3	-23.3497
C4 -H23	1.10079				C1 -O5 -C4 -H22	94.1575
C6 -H24	1.08379				C1 -O5 -C4 -H23	-149.247
C7 -C10	1.5166				C1 -C6 -C7 -C8	0.312544
C8 -O12	1.38819				C1 -C6 -C7 -C10	-179.745
C10 -C11	1.55679				C2 -C1 -O5 -C4	13.3755
C10 -H26	1.10223				C2 -C1 -C6 -C7	-0.101417
C11 -C16	1.52879				C2 -C1 -C6 -H24	179.886
C13 -O14	1.43503				C2 -O3 -C4 -O5	23.3231
C13 -H29	1.10287				C2 -O3 -C4 -H22	-94.18
C15 -C16	1.48375				C2 -O3 -C4 -H23	149.214
C16 -C20	1.413				C2 -C9 -C8 -C7	0.139147
C17 -H30	1.0837				C2 -C9 -C8 -O12	179.933
C18 -O21	1.39723				O3 -C2 -C1 -O5	-0.065094
C19 -H31	1.08478				O3 -C2 -C1 -C6	-179.836
O21 -H33	0.950541				O3 -C2 -C9 -C8	179.789
C1 -O5	1.37749				O3 -C2 -C9 -H25	-0.186817
C2 -O3	1.37785				C4 -O3 -C2 -C9	166.967
O3 -C4	1.46785				C4 -O5 -C1 -C6	-166.86
C4 -H22	1.10396				O5 -C1 -C2 -C9	179.689
C6 -C7	1.48315				O5 -C1 -C6 -C7	-179.841
C7 -C8	1.37526				O5 -C1 -C6 -H24	0.146924
C8 -C9	1.48319				C6 -C1 -C2 -C9	-0.082177
C9 -H25	1.08334				C6 -C7 -C8 -C9	-0.341958
C10 -C13	1.54531				C6 -C7 -C8 -O12	179.85
C11 -O12	1.44814				C6 -C7 -C10 -C11	-163.557
C11 -H27	1.10382				C6 -C7 -C10 -C13	80.7725
C13 -H28	1.10105				C6 -C7 -C10 -H26	-44.1993
O14 -C15	1.39617				C7 -C8 -C9 -H25	-179.885
C15 -C17	1.39937				C7 -C8 -O12 -C11	-17.71
C17 -C18	1.48149				C7 -C10 -C11 -O12	-27.3714
C18 -C19	1.41443				C7 -C10 -C11 -C16	-150.867
C19 -C20	1.48225				C7 -C10 -C11 -H27	88.5779
C20 -H32	1.08526				C7 -C10 -C13 -O14	171.824
					C7 -C10 -C13 -H28	-69.0728
					C7 -C10 -C13 -H29	50.7647
					C8 -C7 -C6 -H24	-179.675
					C8 -C7 -C10 -C11	16.3923
					C8 -C7 -C10 -C13	-99.2779
					C8 -C7 -C10 -H26	135.75
					C8 -O12 -C11 -C10	27.8364
					C8 -O12 -C11 -C16	151.866
					C8 -O12 -C11 -H27	-88.9978
					C9 -C8 -C7 -C10	179.704
					C9 -C8 -O12 -C11	162.485
					C10 -C7 -C6 -H24	0.267688
					C10 -C7 -C8 -O12	-0.104067
					C10 -C11 -C16 -C15	4.55348
					C10 -C11 -C16 -C20	-175.261
					C10 -C13 -O14 -C15	-59.4224
					C11 -C10 -C13 -O14	63.5165
					C11 -C10 -C13 -H28	-177.38
					C11 -C10 -C13 -H29	-57.5428
					C11 -C16 -C15 -O14	1.18345
					C11 -C16 -C15 -C17	-178.817
					C11 -C16 -C20 -C19	179.084
					C11 -C16 -C20 -H32	-0.748021
					O12 -C8 -C9 -H25	-0.091494
					O12 -C11 -C10 -C13	88.3179
					O12 -C11 -C10 -H26	-146.902
					O12 -C11 -C16 -C15	-116.729
					O12 -C11 -C16 -C20	63.4565
					C13 -C10 -C11 -C16	-35.1774
					C13 -C10 -C11 -H27	-155.733
					C13 -O14 -C15 -C16	27.1536
					C13 -O14 -C15 -C17	-152.846
					O14 -C13 -C10 -H26	-62.1696
					O14 -C15 -C16 -C20	-179.001
					O14 -C15 -C17 -C18	179.44
					O14 -C15 -C17 -H30	-0.348612
					C15 -O14 -C13 -H28	-179.305
					C15 -O14 -C13 -H29	62.3361
					C15 -C16 -C11 -H27	125.026
					C15 -C16 -C20 -C19	-0.730652
					C15 -C16 -C20 -H32	179.437
					C15 -C17 -C18 -C19	-0.136191
					C15 -C17 -C18 -O21	179.938
					C16 -C11 -C10 -H26	89.6025
					C16 -C15 -C17 -C18	-0.560311
					C16 -C15 -C17 -H30	179.651
					C16 -C20 -C19 -C18	0.035767
					C16 -C20 -C19 -H31	-179.842
					C17 -C15 -C16 -C20	0.998584
					C17 -C18 -C19 -C20	0.405288
					C17 -C18 -C19 -H31	-179.719
					C17 -C18 -O21 -H33	-179.51
					C18 -C19 -C20 -H32	179.868
					C19 -C18 -C17 -H30	179.652
					C19 -C18 -O21 -H33	0.566482
					C20 -C16 -C11 -H27	-54.788
					C20 -C19 -C18 -O21	-179.671
					O21 -C18 -C17 -H30	-0.273221
					O21 -C18 -C19 -H31	0.205034
					H26 -C10 -C11 -H27	-30.9529
					H26 -C10 -C13 -H28	56.9335
					H26 -C10 -C13 -H29	176.771
					H31 -C19 -C20 -H32	-0.00947

## Sheet: Torsion angle
Torsion angle
C1 -C2 -O3 -C4	-13.2852
C1 -C2 -C9 -C8	0.068961
C1 -C2 -C9 -H25	-179.906
C1 -O5 -C4 -O3	-23.3497
C1 -O5 -C4 -H22	94.1575
C1 -O5 -C4 -H23	-149.247
C1 -C6 -C7 -C8	0.312544
C1 -C6 -C7 -C10	-179.745
C2 -C1 -O5 -C4	13.3755
C2 -C1 -C6 -C7	-0.101417
C2 -C1 -C6 -H24	179.886
C2 -O3 -C4 -O5	23.3231
C2 -O3 -C4 -H22	-94.18
C2 -O3 -C4 -H23	149.214
C2 -C9 -C8 -C7	0.139147
C2 -C9 -C8 -O12	179.933
O3 -C2 -C1 -O5	-0.065094
O3 -C2 -C1 -C6	-179.836
O3 -C2 -C9 -C8	179.789
O3 -C2 -C9 -H25	-0.186817
C4 -O3 -C2 -C9	166.967
C4 -O5 -C1 -C6	-166.86
O5 -C1 -C2 -C9	179.689
O5 -C1 -C6 -C7	-179.841
O5 -C1 -C6 -H24	0.146924
C6 -C1 -C2 -C9	-0.082177
C6 -C7 -C8 -C9	-0.341958
C6 -C7 -C8 -O12	179.85
C6 -C7 -C10 -C11	-163.557
C6 -C7 -C10 -C13	80.7725
C6 -C7 -C10 -H26	-44.1993
C7 -C8 -C9 -H25	-179.885
C7 -C8 -O12 -C11	-17.71
C7 -C10 -C11 -O12	-27.3714
C7 -C10 -C11 -C16	-150.867
C7 -C10 -C11 -H27	88.5779
C7 -C10 -C13 -O14	171.824
C7 -C10 -C13 -H28	-69.0728
C7 -C10 -C13 -H29	50.7647
C8 -C7 -C6 -H24	-179.675
C8 -C7 -C10 -C11	16.3923
C8 -C7 -C10 -C13	-99.2779
C8 -C7 -C10 -H26	135.75
C8 -O12 -C11 -C10	27.8364
C8 -O12 -C11 -C16	151.866
C8 -O12 -C11 -H27	-88.9978
C9 -C8 -C7 -C10	179.704
C9 -C8 -O12 -C11	162.485
C10 -C7 -C6 -H24	0.267688
C10 -C7 -C8 -O12	-0.104067
C10 -C11 -C16 -C15	4.55348
C10 -C11 -C16 -C20	-175.261
C10 -C13 -O14 -C15	-59.4224
C11 -C10 -C13 -O14	63.5165
C11 -C10 -C13 -H28	-177.38
C11 -C10 -C13 -H29	-57.5428
C11 -C16 -C15 -O14	1.18345
C11 -C16 -C15 -C17	-178.817
C11 -C16 -C20 -C19	179.084
C11 -C16 -C20 -H32	-0.748021
O12 -C8 -C9 -H25	-0.091494
O12 -C11 -C10 -C13	88.3179
O12 -C11 -C10 -H26	-146.902
O12 -C11 -C16 -C15	-116.729
O12 -C11 -C16 -C20	63.4565
C13 -C10 -C11 -C16	-35.1774
C13 -C10 -C11 -H27	-155.733
C13 -O14 -C15 -C16	27.1536
C13 -O14 -C15 -C17	-152.846
O14 -C13 -C10 -H26	-62.1696
O14 -C15 -C16 -C20	-179.001
O14 -C15 -C17 -C18	179.44
O14 -C15 -C17 -H30	-0.348612
C15 -O14 -C13 -H28	-179.305
C15 -O14 -C13 -H29	62.3361
C15 -C16 -C11 -H27	125.026
C15 -C16 -C20 -C19	-0.730652
C15 -C16 -C20 -H32	179.437
C15 -C17 -C18 -C19	-0.136191
C15 -C17 -C18 -O21	179.938
C16 -C11 -C10 -H26	89.6025
C16 -C15 -C17 -C18	-0.560311
C16 -C15 -C17 -H30	179.651
C16 -C20 -C19 -C18	0.035767
C16 -C20 -C19 -H31	-179.842
C17 -C15 -C16 -C20	0.998584
C17 -C18 -C19 -C20	0.405288
C17 -C18 -C19 -H31	-179.719
C17 -C18 -O21 -H33	-179.51
C18 -C19 -C20 -H32	179.868
C19 -C18 -C17 -H30	179.652
C19 -C18 -O21 -H33	0.566482
C20 -C16 -C11 -H27	-54.788
C20 -C19 -C18 -O21	-179.671
O21 -C18 -C17 -H30	-0.273221
O21 -C18 -C19 -H31	0.205034
H26 -C10 -C11 -H27	-30.9529
H26 -C10 -C13 -H28	56.9335
H26 -C10 -C13 -H29	176.771
H31 -C19 -C20 -H32	-0.00947

## Sheet: ESP
Electrostatic potential
Atom	Charge
C1	0.19116
C2	0.2965
O3	-0.31901
C4	0.24559
O5	-0.31695
C6	-0.28076
C7	-0.2908
C8	0.33599
C9	-0.44825
C10	0.13301
C11	0.19079
O12	-0.31391
C13	0.13457
O14	-0.39618
C15	0.37903
C16	-0.28085
C17	-0.38915
C18	0.42271
C19	-0.43903
C20	0.01154
O21	-0.5618
H22	0.03597
H23	0.091
H24	0.20794
H25	0.22758
H26	0.04833
H27	0.0401
H28	0.05694
H29	0.05838
H30	0.1998
H31	0.17406
H32	0.13305
H33	0.42265

## Sheet: Mulliken
Mulliken charges
Atom	Charge
C1	0.28764
C2	0.30153
O3	-0.49907
C4	0.24996
O5	-0.50286
C6	-0.15962
C7	-0.0395
C8	0.32324
C9	-0.19759
C10	-0.15478
C11	0.14539
O12	-0.51662
C13	0.06495
O14	-0.51181
C15	0.33264
C16	-0.05738
C17	-0.19347
C18	0.33539
C19	-0.18073
C20	-0.08767
O21	-0.54651
H22	0.12364
H23	0.13035
H24	0.11935
H25	0.12615
H26	0.11739
H27	0.11034
H28	0.1144
H29	0.11877
H30	0.12209
H31	0.08806
H32	0.11477
H33	0.32156
